# Supplementary material
Source: MDPI journal article supplement (https://www.mdpi.com/search?q=jof-05-00007)
Supplement: s001 [file jof-05-00007-s001.pdf]

## Supplementary Materials

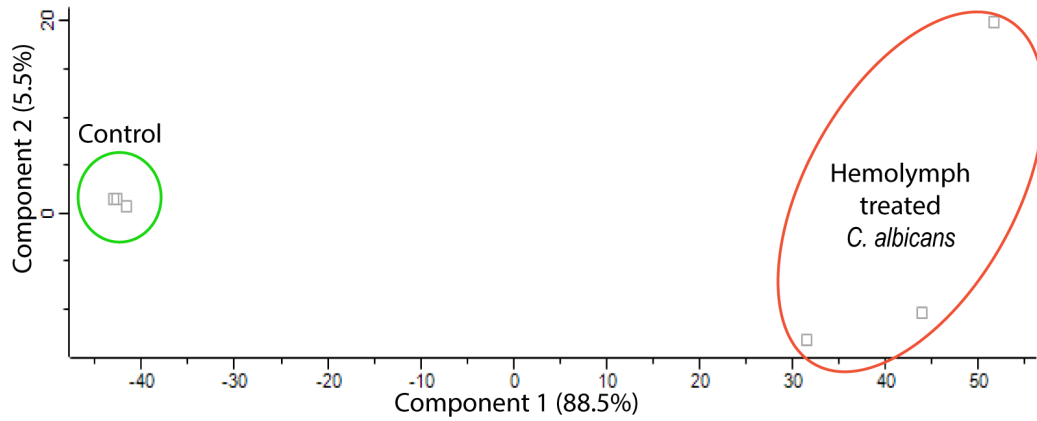

**Figure S1:** Shotgun quantitative proteomic analysis of *C. albicans* incubated in *G. mellonella* 100% hemolymph for 6 hours at 30 °C. Principal component analysis (PCA) of *C. albicans* incubated in 100% hemolymph and PBS for 6 hours with a clear distinction between control and treatment

**Table S1:** Functional enrichment of *C. albicans* proteins released during infection of *G. mellonella* larvae. *C. albicans* proteins found during in hemolymph during infection of *G. mellonella* larvae were grouped into functional categories based on the GO (Gene Ontology) annotations, using the FungiFun application.

### Biological Processes

| GO name                                                                               | Exact p-value | Adjusted p-value | # genes / input |
|---------------------------------------------------------------------------------------|---------------|------------------|-----------------|
| interaction with host                                                                 | 1.40E-08      | 6.8596e-7        | 6 / 101         |
| cellular response to heat                                                             | 0.011762      | 0.040686         | 3 / 101         |
| tricarboxylic acid cycle                                                              | 0.0111        | 0.039035         | 2 / 101         |
| translational frameshifting                                                           | 0.0090044     | 0.032202         | 1 / 101         |
| intracellular steroid hormone receptor signaling pathway                              | 0.0090044     | 0.032202         | 1 / 101         |
| carbohydrate metabolic process                                                        | 0.0063708     | 0.032202         | 4 / 101         |
| cell wall organization                                                                | 0.0061783     | 0.032202         | 3 / 101         |
| filamentous growth of a population of unicellular organisms in response to neutral pH | 0.0048813     | 0.032202         | 4 / 101         |
| response to stress                                                                    | 0.004316      | 0.032202         | 3 / 101         |
| pathogenesis                                                                          | 0.0036173     | 0.032202         | 9 / 101         |

### Molecular Function

| GO name                                              | Exact p-value | Adjusted p-value | # genes / input |
|------------------------------------------------------|---------------|------------------|-----------------|
| protein binding                                      | 1.9506e-8     | 6.8596e-7        | 6 / 101         |
| voltage-gated anion channel activity                 | 0.0090044     | 0.032202         | 1 / 101         |
| phosphoglycerate kinase activity                     | 0.0090044     | 0.032202         | 1 / 101         |
| protein domain specific binding                      | 0.0090044     | 0.032202         | 1 / 101         |
| [acyl-carrier-protein] S-acetyltransferase activity  | 0.0090044     | 0.032202         | 1 / 101         |
| [acyl-carrier-protein] S-malonyltransferase activity | 0.0090044     | 0.032202         | 1 / 101         |
| glucan endo-1,3-beta-D-glucosidase activity          | 0.0090044     | 0.032202         | 1 / 101         |
| tripeptidase activity                                | 0.0090044     | 0.032202         | 1 / 101         |
| GTP binding                                          | 0.0063708     | 0.032202         | 4 / 101         |
| nucleotide binding                                   | 0.0036272     | 0.032202         | 11 / 101        |

### Cellular Component

| GO name               | Exact p-value | Adjusted p-value | # genes / input |
|-----------------------|---------------|------------------|-----------------|
| cytoplasm             | 2.5692e-8     | 7.7444e-7        | 17 / 101        |
| hyphal cell wall      | 1.0846e-10    | 7.6282e-9        | 10 / 101        |
| fungal-type cell wall | 7.0681e-12    | 7.4568e-10       | 12 / 101        |
| extracellular region  | 1.9038e-8     | 6.8596e-7        | 11 / 101        |
| cell surface          | 8.2643e-15    | 1.7438e-12       | 16 / 101        |

**Table S2:** List of proteins detected in *G. mellonella* larval hemolymph after 24 hours infection with *C. albicans* at 30 °C.

| Uniprot ID | Protein Name                                                                                                                        | Score  |
|------------|-------------------------------------------------------------------------------------------------------------------------------------|--------|
| Q59LF8     | Uncharacterized protein                                                                                                             | 7.7409 |
| A0A1D8PDX7 | Uncharacterized protein                                                                                                             | 5.6692 |
| A0A1D8PF42 | Uncharacterized protein                                                                                                             | 5.9446 |
| A0A1D8PST6 | Uncharacterized protein                                                                                                             | 5.6758 |
| Q59Q31     | Uncharacterized protein                                                                                                             | 5.6966 |
| Q59W37     | Uncharacterized protein                                                                                                             | 5.6725 |
| A0A1D8PGR8 | Uncharacterized protein                                                                                                             | 7.9593 |
| A0A1D8PL12 | Uncharacterized protein                                                                                                             | 5.6592 |
| A0A1D8PQF9 | Uncharacterized protein                                                                                                             | 26.633 |
| Q59WF2     | Uncharacterized protein                                                                                                             | 5.6608 |
| Q59WE9     | Uncharacterized protein                                                                                                             | 6.1614 |
| A0A1D8PMI5 | Uncharacterized protein                                                                                                             | 5.6584 |
| Q5A881     | Uncharacterized protein                                                                                                             | 7.9593 |
| Q5ANL8     | Uncharacterized protein                                                                                                             | 5.6593 |
| A0A1D8PI28 | Uncharacterized protein                                                                                                             | 5.6614 |
| A0A1D8PDN5 | Uncharacterized protein                                                                                                             | 5.9529 |
| A0A1D8PEH4 | Uncharacterized protein                                                                                                             | 5.9325 |
| A0A1D8PKC4 | Ubiquitin-specific protease                                                                                                         | 6.8759 |
| Q5A109     | Ubiquitin-ribosomal 40S subunit protein S31 fusion protein                                                                          | 27.124 |
| A0A1D8PC97 | Tubulin beta chain                                                                                                                  | 323.31 |
| Q5ADR6     | Translation initiation factor eIF2B subunit delta                                                                                   | 5.6603 |
| Q59P53     | Translation factor GUF1, mitochondrial (EC 3.6.5.-) (Elongation factor 4 homolog) (EF-4) (GTPase GUF1) (Ribosomal back-translocase) | 5.8389 |
| A0A1D8PM35 | Translation elongation factor 1 subunit beta                                                                                        | 25.804 |
| Q59N20     | Transcription activator MSS11                                                                                                       | 6.1961 |
| A0A1D8PJA8 | Tos1p                                                                                                                               | 164.21 |
| A0A1D8PU69 | Thioredoxin                                                                                                                         | 44.721 |
| Q5A4W7     | Tetrafunctional fatty acid synthase subunit                                                                                         | 5.9325 |
| Q5A0X8     | Surface antigen protein 2                                                                                                           | 39.745 |
| Q5A2A1     | Succinate dehydrogenase [ubiquinone] flavoprotein subunit, mitochondrial (EC 1.3.5.1)                                               | 192.87 |
| Q59M48     | Ste13p                                                                                                                              | 5.8699 |
| A0A1D8PSJ3 | Sgd1p                                                                                                                               | 7.9593 |
| A0A1D8PQA0 | Serine/threonine-protein phosphatase (EC 3.1.3.16)                                                                                  | 6.2985 |
| Q5AKV0     | Serine C-palmitoyltransferase                                                                                                       | 5.7159 |
| Q5AB48     | Secreted protein RBT4 (PRY family protein 4) (Repressed by TUP1 protein 4)                                                          | 260.77 |
| Q59NP5     | Secreted beta-glucosidase SUN41 (EC 3.2.1.-)                                                                                        | 50.289 |
| A0A1D8PQE5 | RNA export factor                                                                                                                   | 5.7826 |
| A0A1D8PQ43 | Ribonuclease H (RNase H) (EC 3.1.26.4)                                                                                              | 6.2477 |
| Q5ACL4     | Restriction of telomere capping protein 1                                                                                           | 5.9325 |
| A0A1D8PTI2 | Rab family GTPase                                                                                                                   | 6.0995 |

|            |                                                                                                                                                        |        |
|------------|--------------------------------------------------------------------------------------------------------------------------------------------------------|--------|
| P83775     | Putative NADPH-dependent methylglyoxal reductase GRP2 (EC 1.1.1.283) (Cytoplasmic antigenic protein 2)                                                 | 177.62 |
| A0A1D8PJ20 | Proteasome endopeptidase complex (EC 3.4.25.1)                                                                                                         | 5.7313 |
| P46273     | Phosphoglycerate kinase (EC 2.7.2.3)                                                                                                                   | 8.9416 |
| A0A1D8PRM7 | Phosphoenolpyruvate carboxykinase                                                                                                                      | 23.656 |
| A0A1D8PEF9 | Pfk26p                                                                                                                                                 | 11.519 |
| Q9Y7F0     | Peroxiredoxin TSA1-A (EC 1.11.1.15) (Thiol-specific antioxidant protein) (Thioredoxin peroxidase)                                                      | 7.4149 |
| A0A1D8PS61 | Opt3p                                                                                                                                                  | 5.9325 |
| Q59UZ4     | Opt2p                                                                                                                                                  | 5.9325 |
| Q5AG68     | Nucleoside diphosphate kinase (EC 2.7.4.6)                                                                                                             | 29.991 |
| P83781     | Mitochondrial outer membrane protein porin (Cytoplasmic antigenic protein 4)                                                                           | 6.7964 |
| P83778     | Malate dehydrogenase, cytoplasmic (EC 1.1.1.37)                                                                                                        | 40.507 |
| A0A1D8PCJ7 | Mak32p                                                                                                                                                 | 5.6759 |
| A0A1D8PS79 | Isocitrate dehydrogenase [NADP] (EC 1.1.1.42)                                                                                                          | 12.734 |
| P83777     | Inorganic pyrophosphatase (EC 3.6.1.1) (Pyrophosphate phospho-hydrolase) (PPase)                                                                       | 7.022  |
| A0A1D8PSZ0 | Ife2p                                                                                                                                                  | 5.9325 |
| A0A1D8PG96 | Hsp70 family ATPase                                                                                                                                    | 201.87 |
| Q5A397     | Hsp70 family ATPase                                                                                                                                    | 11.766 |
| Q59VP1     | Histone H2B.2                                                                                                                                          | 323.31 |
| Q59VP2     | Histone H2A.2                                                                                                                                          | 6.2119 |
| A0A1D8PSA6 | Histone deacetylase (EC 3.5.1.98)                                                                                                                      | 5.6685 |
| Q59VZ0     | Hgt2p                                                                                                                                                  | 8.0582 |
| P46587     | Heat shock protein SSA2                                                                                                                                | 60.755 |
| Q96VB9     | Heat shock protein homolog SSE1 (Chaperone protein MSI3)                                                                                               | 7.9593 |
| P46598     | Heat shock protein 90 homolog                                                                                                                          | 55.408 |
| Q59P43     | GTP-binding nuclear protein                                                                                                                            | 8.2306 |
| Q5ADM7     | Glyceraldehyde-3-phosphate dehydrogenase (EC 1.2.1.12)                                                                                                 | 55.376 |
| Q9URB4     | Fructose-bisphosphate aldolase (FBP aldolase) (FBPA) (EC 4.1.2.13) (37 kDa major allergen) (Fructose-1,6-bisphosphate aldolase) (IgE-binding allergen) | 35.783 |
| A0A1D8PT02 | Flavodoxin-like fold family protein                                                                                                                    | 74.887 |
| P30575     | Enolase 1 (EC 4.2.1.11) (2-phospho-D-glycerate hydro-lyase) (2-phosphoglycerate dehydratase)                                                           | 100.19 |
| Q5A0M4     | Elongation factor 2 (EF-2)                                                                                                                             | 30.184 |
| Q59QD6     | Elongation factor 1-alpha 2 (EF-1-alpha 2)                                                                                                             | 20.337 |
| Q59UP3     | Dur4p                                                                                                                                                  | 5.9325 |
| A0A1D8PME5 | DNA-binding E3 ubiquitin-protein ligase                                                                                                                | 5.659  |
| Q5AGX1     | DNA repair protein                                                                                                                                     | 5.7247 |
| A0A1D8PML0 | DNA primase large subunit (EC 2.7.7.-)                                                                                                                 | 5.7479 |
| Q5AKA5     | Cys-Gly metalloprotease DUG1 (EC 3.4.13.-) (Deficient in utilization of glutathione protein 1) (GSH degradosomal complex subunit DUG1)                 | 6.7964 |
| Q59M50     | Cwt1p                                                                                                                                                  | 5.7175 |
| A0A1D8PSH3 | Citrate synthase                                                                                                                                       | 6.126  |
| A0A1D8PFK5 | Chitin synthase                                                                                                                                        | 5.6786 |

|            |                                                                                                        |        |
|------------|--------------------------------------------------------------------------------------------------------|--------|
| Q5AF39     | Cell wall protein PGA59 (GPI-anchored protein 59)                                                      | 6.7964 |
| Q5A1E0     | Cell wall protein IFF5 (Adhesin-like protein IFF5)                                                     | 6.7964 |
| G1UB63     | Cell wall protein 1 (Surface antigen protein 1) (Wall protein 1)                                       | 6.2214 |
| Q59XX2     | Cell surface mannoprotein MP65 (EC 3.2.1.-) (Mannoprotein of 65 kDa)<br>(Soluble cell wall protein 10) | 323.31 |
| A0A1D8PM94 | Ald6p                                                                                                  | 5.8108 |
| A0A1D8PP43 | Adh1p                                                                                                  | 6.6413 |
| A0A1D8PFR4 | Actin                                                                                                  | 323.31 |
| Q59WG3     | AAA family ATPase                                                                                      | 31.856 |
| A0A1D8PFG4 | 60S ribosomal protein L27                                                                              | 6.1451 |
| A0A1D8PFS4 | 6-phosphogluconate dehydrogenase, decarboxylating (EC 1.1.1.44)                                        | 22.893 |
| O42766     | 14-3-3 protein homolog                                                                                 | 31.898 |

**Table S3:** Functional enrichment of proteins differentially abundant proteins from *C. albicans* exposed to *G. mellonella* larvae hemolymph. Proteins that were found statistically significant and differentially abundance in *C. albicans* exposed to 100% hemolymph were grouped into functional categories based on the GO (Gene Ontology) annotations, using the FungiFun application.

### Biological process

| GO name                                                    | Exact p-value | # genes / category |
|------------------------------------------------------------|---------------|--------------------|
| translation                                                | 6.6882e-35    | 58 / 128           |
| formation of translation preinitiation complex             | 6.3724e-9     | 7 / 7              |
| regulation of translational initiation                     | 4.7997e-8     | 7 / 8              |
| translational initiation                                   | 9.2525e-8     | 12 / 28            |
| glycolytic process                                         | 1.8762e-7     | 10 / 20            |
| protein folding                                            | 1.1493E-06    | 14 / 46            |
| carbohydrate metabolic process                             | 1.8874E-06    | 19 / 83            |
| translational elongation                                   | 3.3663E-06    | 8 / 16             |
| oxidation-reduction process                                | 9.7092E-06    | 51 / 407           |
| methionine biosynthetic process                            | 0.000014358   | 7 / 14             |
| GDP-mannose biosynthetic process                           | 0.000021031   | 4 / 4              |
| malate metabolic process                                   | 0.000021031   | 4 / 4              |
| pyrimidine nucleotide biosynthetic process                 | 0.000099493   | 4 / 5              |
| tricarboxylic acid cycle                                   | 0.00010481    | 7 / 18             |
| cellular amino acid biosynthetic process                   | 0.00012384    | 10 / 37            |
| interaction with host                                      | 0.00022661    | 7 / 20             |
| sulfate assimilation                                       | 0.00031166    | 3 / 3              |
| carbohydrate phosphorylation                               | 0.0011525     | 5 / 13             |
| fatty acid beta-oxidation                                  | 0.0011807     | 4 / 8              |
| glutamine metabolic process                                | 0.0011835     | 3 / 4              |
| 'de novo' pyrimidine nucleobase biosynthetic process       | 0.0011835     | 3 / 4              |
| glyoxylate cycle                                           | 0.0011835     | 3 / 4              |
| UDP-N-acetylglucosamine biosynthetic process               | 0.0011835     | 3 / 4              |
| glycogen biosynthetic process                              | 0.0011835     | 3 / 4              |
| trehalose biosynthetic process                             | 0.0011835     | 3 / 4              |
| cellular carbohydrate metabolic process                    | 0.0011835     | 3 / 4              |
| cellular response to drug                                  | 0.0013596     | 37 / 328           |
| L-methionine biosynthetic process from methylthioadenosine | 0.0028096     | 3 / 5              |
| cellular protein metabolic process                         | 0.0031744     | 4 / 10             |
| protein peptidyl-prolyl isomerization                      | 0.0031744     | 4 / 10             |
| phosphorylation                                            | 0.0034577     | 15 / 102           |
| rRNA processing                                            | 0.0034921     | 11 / 64            |
| ribosome biogenesis                                        | 0.0034921     | 11 / 64            |

|                                                             |           |        |
|-------------------------------------------------------------|-----------|--------|
| induction by symbiont of host defense response              | 0.0044638 | 6 / 24 |
| hydrogen sulfide biosynthetic process                       | 0.0046075 | 2 / 2  |
| mitochondrial electron transport, ubiquinol to cytochrome c | 0.0046075 | 2 / 2  |
| 'de novo' UMP biosynthetic process                          | 0.0046075 | 2 / 2  |
| acetyl-CoA biosynthetic process                             | 0.0046075 | 2 / 2  |
| fructose 6-phosphate metabolic process                      | 0.0046075 | 2 / 2  |
| acetyl-CoA biosynthetic process from acetate                | 0.0046075 | 2 / 2  |
| hydrogen ion transmembrane transport                        | 0.0047234 | 4 / 11 |
| response to toxic substance                                 | 0.0053367 | 3 / 6  |
| regulation of actin filament polymerization                 | 0.0053367 | 3 / 6  |

## Molecular function

| GO name                                                                               | Exact p-value | Adjusted p-value | # genes / category |
|---------------------------------------------------------------------------------------|---------------|------------------|--------------------|
| structural constituent of ribosome                                                    | 1.5601e-21    | 3.2372e-19       | 36 / 81            |
| nucleotide binding                                                                    | 3.8332e-9     | 3.977e-7         | 68 / 490           |
| lyase activity                                                                        | 5.7546e-8     | 2.9852E-06       | 13 / 32            |
| RNA binding                                                                           | 7.1461e-8     | 3.489E-06        | 30 / 152           |
| translation initiation factor activity                                                | 9.2525e-8     | 4.0419E-06       | 12 / 28            |
| catalytic activity                                                                    | 5.7322e-7     | 2.2656E-05       | 46 / 319           |
| isomerase activity                                                                    | 6.1527E-06    | 0.00018238       | 11 / 33            |
| translation elongation factor activity                                                | 6.1685E-05    | 0.0015515        | 6 / 12             |
| transferase activity                                                                  | 6.4532E-05    | 0.0015753        | 36 / 271           |
| ATP binding                                                                           | 0.00014516    | 0.0030893        | 53 / 473           |
| L-malate dehydrogenase activity                                                       | 0.00031166    | 0.0056234        | 3 / 3              |
| malate dehydrogenase activity                                                         | 0.00031166    | 0.0056234        | 3 / 3              |
| unfolded protein binding                                                              | 0.00039326    | 0.0068002        | 8 / 28             |
| peptidyl-prolyl cis-trans isomerase activity                                          | 0.00046366    | 0.0078539        | 5 / 11             |
| cytochrome-c oxidase activity                                                         | 0.00062369    | 0.010353         | 4 / 7              |
| metallopeptidase activity                                                             | 0.00087226    | 0.013756         | 6 / 18             |
| oxidoreductase activity                                                               | 0.0008784     | 0.013756         | 36 / 309           |
| metal ion binding                                                                     | 0.00092029    | 0.014145         | 45 / 414           |
| kinase activity                                                                       | 0.00097425    | 0.014702         | 14 / 81            |
| oxidoreductase activity, acting on the CH-OH group of donors, NAD or NADP as acceptor | 0.0010464     | 0.014884         | 8 / 32             |
| succinate dehydrogenase activity                                                      | 0.0011835     | 0.014884         | 3 / 4              |
| GTP binding                                                                           | 0.0012476     | 0.015456         | 14 / 83            |
| protein binding                                                                       | 0.0021413     | 0.024684         | 6 / 21             |
| ligase activity                                                                       | 0.0030085     | 0.033294         | 10 / 54            |
| ATP-dependent helicase activity                                                       | 0.0032905     | 0.034571         | 7 / 30             |
| flavin adenine dinucleotide binding                                                   | 0.0040265     | 0.037128         | 8 / 39             |
| trehalose-phosphatase activity                                                        | 0.0046075     | 0.037128         | 2 / 2              |
| cytochrome-b5 reductase activity, acting on NAD(P)H                                   | 0.0046075     | 0.037128         | 2 / 2              |

|                                                                                 |           |          |          |
|---------------------------------------------------------------------------------|-----------|----------|----------|
| AMP binding                                                                     | 0.0046075 | 0.037128 | 2 / 2    |
| 6-phosphofructokinase activity                                                  | 0.0046075 | 0.037128 | 2 / 2    |
| mannose-1-phosphate guanylyltransferase activity                                | 0.0046075 | 0.037128 | 2 / 2    |
| acetate-CoA ligase activity                                                     | 0.0046075 | 0.037128 | 2 / 2    |
| FK506 binding                                                                   | 0.0046075 | 0.037128 | 2 / 2    |
| oxidoreductase activity, acting on a sulfur group of donors, NAD(P) as acceptor | 0.0046075 | 0.037128 | 2 / 2    |
| pyruvate dehydrogenase (acetyl-transferring) activity                           | 0.0046075 | 0.037128 | 2 / 2    |
| 3-dehydroquinate dehydratase activity                                           | 0.0046075 | 0.037128 | 2 / 2    |
| NAD binding                                                                     | 0.0048362 | 0.038229 | 7 / 32   |
| peptidase activity                                                              | 0.005024  | 0.039339 | 11 / 67  |
| hydrolase activity                                                              | 0.0053339 | 0.040268 | 35 / 331 |
| peptide binding                                                                 | 0.0053367 | 0.040268 | 3 / 6    |
| GTPase activity                                                                 | 0.0064613 | 0.048314 | 8 / 42   |
| aminopeptidase activity                                                         | 0.0067097 | 0.049724 | 4 / 12   |

### Cellular Component

| GO name                                            | Exact p-value | Adjusted p-value | # genes / category |
|----------------------------------------------------|---------------|------------------|--------------------|
| cytoplasm                                          | 3.3477e-39    | 2.7786e-36       | 106 / 393          |
| ribosome                                           | 6.1521e-22    | 1.7021e-19       | 37 / 84            |
| ribonucleoprotein complex                          | 3.7798e-15    | 6.2745e-13       | 28 / 72            |
| cell surface                                       | 1.1072e-11    | 1.5316e-9        | 33 / 129           |
| eukaryotic translation initiation factor 3 complex | 4.2598e-10    | 5.0509e-8        | 8 / 8              |
| eukaryotic 43S preinitiation complex               | 6.3724e-9     | 4.8083e-7        | 7 / 7              |
| eukaryotic 48S preinitiation complex               | 6.3724e-9     | 4.8083e-7        | 7 / 7              |
| intracellular                                      | 9.5751e-9     | 6.6228e-7        | 29 / 132           |
| yeast-form cell wall                               | 1.0982e-8     | 7.0116e-7        | 16 / 44            |
| cytosol                                            | 5.1594e-8     | 2.8549E-06       | 14 / 37            |
| plasma membrane                                    | 9.0272e-7     | 3.4057E-05       | 46 / 324           |
| hyphal cell wall                                   | 2.305E-06     | 7.6527E-05       | 16 / 62            |
| mitochondrion                                      | 5.2393E-06    | 0.00016106       | 29 / 175           |
| large ribosomal subunit                            | 0.00014177    | 0.0030893        | 5 / 9              |
| fungal-type cell wall                              | 0.00017938    | 0.0037222        | 16 / 86            |
| hyphal septin ring                                 | 0.00031166    | 0.0056234        | 3 / 3              |
| cytosolic small ribosomal subunit                  | 0.00031166    | 0.0056234        | 3 / 3              |
| small-subunit processome                           | 0.00039326    | 0.0068002        | 8 / 28             |
| cytoskeleton                                       | 0.00083335    | 0.013562         | 8 / 31             |
| peroxisome                                         | 0.001621      | 0.019499         | 6 / 20             |
| chromosome                                         | 0.0016826     | 0.019951         | 9 / 42             |
| nucleosome                                         | 0.0020118     | 0.023518         | 4 / 9              |
| mitochondrial outer membrane                       | 0.0024005     | 0.027294         | 5 / 15             |
| small ribosomal subunit                            | 0.0031744     | 0.033779         | 4 / 10             |



|                                    |           |          |          |
|------------------------------------|-----------|----------|----------|
| nucleus                            | 0.0042815 | 0.037128 | 59 / 622 |
| cellular bud neck septin structure | 0.0046075 | 0.037128 | 2 / 2    |
| 6-phosphofructokinase complex      | 0.0046075 | 0.037128 | 2 / 2    |

**Table S4:** List of proteins detected which were statistically significant and differentially in *C. albicans* incubated in *G. mellonella* hemolymph as compared to PBS after 6 hours incubated at 30 °C

(A) Proteins increased in abundance in *C. albicans* incubated in *G. mellonella* hemolymph.

| Fold Change (+) | Uniprot ID | Protein Name                                         |
|-----------------|------------|------------------------------------------------------|
| 44.4            | A0A1D8PL15 | D-arabinose 1-dehydrogenase                          |
| 12.1            | Q59VX7     | Karyopherin beta                                     |
| 11.6            | A0A1D8PEW7 | Uncharacterized protein                              |
| 8.3             | Q5AND9     | Arf family GTPase                                    |
| 8.0             | A0A1D8PGR6 | 5-oxoprolinase                                       |
| 7.9             | A0A1D8PLT4 | Karyopherin                                          |
| 7.8             | Q5AI87     | Carboxymethylenebutenolidase                         |
| 7.7             | Q59M69     | ATP-dependent                                        |
| 7.6             | Q59K86     | 3-hydroxyanthranilate 3,4-dioxygenase                |
| 7.5             | A0A1D8PIF8 | Leu42p                                               |
| 7.4             | Q59SI4     | Nmd5p                                                |
| 7.2             | A0A1D8PTB8 | Copper metallochaperone                              |
| 7.0             | A0A1D8PR39 | Ahp2p                                                |
| 6.8             | A0A1D8PSW2 | Threonine aldolase                                   |
| 5.9             | A0A1D8PMF7 | Uncharacterized protein                              |
| 5.8             | A0A1D8PC97 | Tubulin beta chain                                   |
| 5.8             | Q5ALW6     | Glutamine-dependent NAD(+) synthetase                |
| 5.7             | A0A1D8PN39 | Uncharacterized protein                              |
| 5.6             | A0A1D8PNJ2 | Uncharacterized protein                              |
| 5.2             | A0A1D8PHY7 | Uncharacterized protein                              |
| 5.2             | A0A1D8PGP5 | Uncharacterized protein                              |
| 4.9             | A0A1D8PDB0 | Proteasome regulatory particle lid subunit           |
| 4.9             | A0A1D8PE84 | Cdr4p                                                |
| 4.7             | A0A1D8PJF0 | Uncharacterized protein                              |
| 4.7             | Q5A015     | Riboflavin kinase                                    |
| 4.6             | A0A1D8PLD7 | Uncharacterized protein                              |
| 4.5             | A0A1D8PU69 | Thioredoxin                                          |
| 4.3             | Q5A8A6     | Carbamoyl-phosphate synthase (Glutamine-hydrolyzing) |
| 4.2             | A0A1D8PE78 | Importin-alpha export receptor                       |
| 4.1             | Q5ADN1     | Protein phosphatase 2A structural subunit            |
| 4.0             | A0A1D8PLE6 | Uncharacterized protein                              |
| 3.9             | A0A1D8PI19 | Phm7p                                                |
| 3.8             | A0A1D8PH17 | V-type proton ATPase subunit F                       |
| 3.7             | Q5AM80     | Enolase-phosphatase E1                               |
| 3.7             | A0A1D8PRI0 | Nicotinate phosphoribosyltransferase                 |
| 3.7             | Q5AG73     | Methylthioribulose-1-phosphate dehydratase MTRu-1-P  |

|     |            |                                                                                 |
|-----|------------|---------------------------------------------------------------------------------|
|     |            | dehydratase                                                                     |
| 3.6 | A0A1D8PPX6 | Uncharacterized protein                                                         |
| 3.6 | Q59RH5     | Histone acetyltransferase type B subunit 2                                      |
| 3.5 | Q59PE7     | Protein BCP1                                                                    |
| 3.4 | Q92209     | Homoserine kinase                                                               |
| 3.4 | A0A1D8PDA4 | Fma1p                                                                           |
| 3.4 | A0A1D8PNK0 | Dap2p                                                                           |
| 3.3 | A0A1D8PHR5 | Pst1p                                                                           |
| 3.3 | A0A1D8PHQ6 | Gre2p                                                                           |
| 3.3 | A0A1D8PTY0 | Uncharacterized protein                                                         |
| 3.3 | Q59NN8     | Hsp70 nucleotide exchange factor FES1                                           |
| 3.2 | A0A1D8PTV7 | Putative cystathionine beta-lyase                                               |
| 3.2 | A0A1D8PQ94 | Hsp90 cochaperone                                                               |
| 3.2 | Q5A5B2     | Uncharacterized protein                                                         |
| 3.1 | A0A1D8PCY4 | Ecm33p                                                                          |
| 3.1 | Q5AH60     | tRNA (guanine-N7-)-methyltransferase non-catalytic subunit TRM82                |
| 3.1 | Q5AMR6     | Uncharacterized protein                                                         |
| 3.0 | A0A1D8PQD4 | E2 ubiquitin-conjugating protein                                                |
| 3.0 | P56553     | Cell growth-regulated gene 1 protein                                            |
| 3.0 | Q5AF44     | Thioredoxin peroxidase                                                          |
| 3.0 | A0A1D8PDL7 | Uncharacterized protein                                                         |
| 3.0 | A0A1D8PFI3 | Ribokinase                                                                      |
| 2.9 | A0A1D8PGI9 | Ubiquitinyl hydrolase 1                                                         |
| 2.9 | A0A1D8PT84 | Uncharacterized protein                                                         |
| 2.9 | Q59Z17     | Catabolic 3-dehydroquinase (cDHQase)                                            |
| 2.8 | Q5A786     | Profilin                                                                        |
| 2.7 | Q59Z50     | Spermidine synthase                                                             |
| 2.7 | A0A1D8PFU8 | Uncharacterized protein                                                         |
| 2.7 | A0A1D8PFV6 | Uncharacterized protein                                                         |
| 2.7 | A0A1D8PPB1 | Ardp                                                                            |
| 2.7 | A0A1D8PE63 | Glutamate--cysteine ligase                                                      |
| 2.7 | G1UAZ9     | Uncharacterized protein                                                         |
| 2.5 | A0A1D8PRF3 | Uncharacterized protein                                                         |
| 2.5 | A0A1D8PNZ4 | Cup1p                                                                           |
| 2.5 | P0CY19     | Deoxyuridine 5'-triphosphate nucleotidohydrolase                                |
| 2.5 | Q5A362     | Cystathionine gamma-lyase                                                       |
| 2.5 | A0A1D8PJD2 | Deoxyhypusine synthase                                                          |
| 2.5 | P87219     | Sorbose reductase SOU1                                                          |
| 2.5 | Q59US5     | Bifunctional cysteine synthase/O-acetylhomoserine aminocarboxypropyltransferase |
| 2.4 | A0A1D8PLH0 | Phosphomevalonate kinase                                                        |
| 2.4 | A0A1D8PJD7 | GTPase-activating protein                                                       |
| 2.4 | Q59Z55     | Uncharacterized protein                                                         |
| 2.4 | Q59S63     | tRNA pseudouridine synthase 1                                                   |

|     |            |                                                                     |
|-----|------------|---------------------------------------------------------------------|
| 2.4 | Q59U89     | Uncharacterized protein                                             |
| 2.4 | Q5AHF9     | Glucosamine 6-phosphate N-acetyltransferase                         |
| 2.4 | Q59P52     | Phosphoserine aminotransferase                                      |
| 2.4 | P43075     | tRNA ligase                                                         |
| 2.4 | Q5ACY8     | 4a-hydroxytetrahydrobiopterin dehydratase                           |
| 2.4 | P28870     | FK506-binding protein 1                                             |
| 2.3 | A0A1D8PHW0 | Sedoheptulose-bisphosphatase                                        |
| 2.3 | A0A1D8PE37 | Amidophosphoribosyltransferase                                      |
| 2.3 | Q5AK98     | Nucleotidase                                                        |
| 2.3 | A0A1D8PFF9 | E2 ubiquitin-conjugating protein                                    |
| 2.3 | A0A1D8PFS4 | 6-phosphogluconate dehydrogenase, decarboxylating                   |
| 2.3 | A0A1D8PKJ3 | E1 ubiquitin-activating protein                                     |
| 2.3 | Q5ABB2     | Lactoylglutathione lyase                                            |
| 2.3 | Q5ALX8     | Adenine phosphoribosyltransferase                                   |
| 2.3 | Q59N80     | Inosine triphosphate pyrophosphatase                                |
| 2.3 | Q5A0L4     | Plc2p                                                               |
| 2.2 | A0A1D8PKW2 | Fructose 1,6-bisphosphate 1-phosphatase                             |
| 2.2 | A0A1D8PP67 | Riboflavin synthase                                                 |
| 2.2 | A0A1D8PH39 | Uncharacterized protein                                             |
| 2.2 | A0A1D8PLI2 | Isopentenyl-diphosphate delta-isomerase                             |
| 2.2 | P46587     | Heat shock protein SSA2                                             |
| 2.1 | Q59X24     | Exopolyphosphatase                                                  |
| 2.1 | Q5AA13     | Gim5p                                                               |
| 2.1 | Q59R27     | Uncharacterized protein                                             |
| 2.1 | A0A1D8PPG2 | Uncharacterized protein                                             |
| 2.1 | A0A1D8PHE5 | Uncharacterized protein                                             |
| 2.1 | Q5AMP4     | Malate dehydrogenase                                                |
| 2.1 | Q59MN2     | Bifunctional 4-alpha-glucanotransferase/amylo-alpha-1,6-glucosidase |
| 2.1 | Q59VY8     | Galactokinase                                                       |
| 2.1 | A0A1D8PJK5 | D-lactate dehydrogenase                                             |
| 2.1 | Q59T95     | Cystathionine beta-synthase                                         |
| 2.1 | Q5A934     | Zinc finger-containing protein                                      |
| 2.1 | A0A1D8PCS7 | Putative pyridoxal 5'-phosphate synthase                            |
| 2.1 | P31225     | Corticosteroid-binding protein                                      |
| 2.1 | A0A1D8PNS0 | Guanylate kinase                                                    |
| 2.1 | A0A1D8PH42 | Branched-chain-amino-acid aminotransferase                          |
| 2.1 | A0A1D8PSA9 | Phosphoglucomutase                                                  |
| 2.0 | Q5ANE2     | Uncharacterized protein                                             |
| 2.0 | Q59WC5     | 4-nitrophenylphosphatase                                            |
| 2.0 | A0A1D8PD11 | Uncharacterized protein                                             |
| 2.0 | Q5ABA2     | Survival factor 1                                                   |
| 2.0 | A0A1D8PU04 | S-formylglutathione hydrolase                                       |
| 2.0 | Q5A1M1     | Tfs1p                                                               |
| 2.0 | A0A1D8PKY7 | Histidine biosynthesis trifunctional protein                        |

|     |            |                                                       |
|-----|------------|-------------------------------------------------------|
| 2.0 | Q59NB8     | Leukotriene A-4 hydrolase homolog                     |
| 2.0 | P0CH96     | Adenylosuccinate synthetase                           |
| 2.0 | A0A1D8PSE7 | Ifr2p                                                 |
| 2.0 | Q5A8Z4     | Superoxide dismutase                                  |
| 2.0 | Q96VB9     | Heat shock protein homolog SSE1                       |
| 2.0 | A0A1D8PH55 | 4-aminobutyrate transaminase                          |
| 2.0 | P0CY20     | 3'2'),5'-bisphosphate nucleotidase 1                  |
| 2.0 | P83778     | Malate dehydrogenase, cytoplasmic                     |
| 2.0 | A0A1D8PT02 | Flavodoxin-like fold family protein                   |
| 2.0 | A0A1D8PQB4 | Dipeptidyl peptidase 3                                |
| 2.0 | A0A1D8PKV4 | Fum12p                                                |
| 2.0 | Q5APF2     | GMP synthase [glutamine-hydrolyzing]                  |
| 2.0 | A0A1D8PPK1 | Ebp1p                                                 |
| 1.9 | Q59MZ5     | Phosphoribosylformylglycinamide synthase              |
| 1.9 | Q5AKA5     | Cys-Gly metallodipeptidase DUG1                       |
| 1.9 | P46598     | Heat shock protein 90 homolog                         |
| 1.9 | Q5AIA6     | Pyridoxine biosynthesis protein                       |
| 1.9 | Q5ANE7     | Pin3p                                                 |
| 1.9 | P22011     | Peptidyl-prolyl cis-trans isomerase                   |
| 1.9 | A0A1D8PMP0 | Oye32p                                                |
| 1.9 | P43076     | pH-responsive protein 1                               |
| 1.9 | A0A1D8PQ57 | Bifunctional AP-4-A phosphorylase/ADP sulfurylase     |
| 1.9 | A0A1D8PLC6 | Putative methyltransferase                            |
| 1.9 | P41797     | Heat shock protein SSA1                               |
| 1.9 | A0A1D8PFY5 | Putative Xaa-Pro dipeptidase                          |
| 1.9 | P83780     | Glucose-6-phosphate isomerase                         |
| 1.9 | A0A1D8PPR2 | 2-deoxyglucose-6-phosphatase                          |
| 1.9 | A0A1D8PIB2 | Asparagine synthase                                   |
| 1.9 | Q5ADN2     | Putative phosphomutase                                |
| 1.9 | Q5A4M2     | Malate dehydrogenase                                  |
| 1.9 | A0A1D8PRQ4 | Uncharacterized protein                               |
| 1.8 | P83775     | Putative NADPH-dependent methylglyoxal reductase GRP2 |
| 1.8 | A0A1D8PHE6 | Uncharacterized protein                               |
| 1.8 | A0A1D8PQN3 | Long-chain fatty acid transporter                     |
| 1.8 | A0A1D8PQH5 | Superoxide dismutase                                  |
| 1.8 | Q59SU1     | Candidapepsin-9                                       |
| 1.8 | A0A1D8PQI4 | Ribulose-phosphate 3-epimerase                        |
| 1.8 | Q59T35     | Osm1p                                                 |
| 1.8 | Q59T45     | Putative amidotransferase                             |
| 1.8 | Q5AG68     | Nucleoside diphosphate kinase                         |
| 1.8 | A0A1D8PTD8 | Thiosulfate sulfurtransferase                         |
| 1.8 | A0A1D8PHU6 | Putative phosphoric monoester hydrolase               |
| 1.8 | A0A1D8PQE6 | Uncharacterized protein                               |
| 1.8 | O42766     | 14-3-3 protein homolog                                |
| 1.8 | A0A1D8PCD2 | Nma111p                                               |

|     |            |                                                                       |
|-----|------------|-----------------------------------------------------------------------|
| 1.8 | A0A1D8PIF6 | Sulfite reductase subunit alpha                                       |
| 1.8 | A0A1D8PRJ1 | Uncharacterized protein                                               |
| 1.8 | Q5ALM6     | Peptidyl-prolyl cis-trans isomerase                                   |
| 1.8 | Q5A500     | Adenylyl-sulfate kinase                                               |
| 1.8 | A0A1D8PNG6 | UDP-N-acetylglucosamine diphosphorylase                               |
| 1.8 | Q5AND4     | Rdi1p                                                                 |
| 1.7 | P30575     | Enolase 1                                                             |
| 1.7 | Q5APD5     | Uncharacterized protein                                               |
| 1.7 | P82612     | Phosphoglycerate mutase                                               |
| 1.7 | Q59MR4     | Coproporphyrinogen oxidase                                            |
| 1.7 | P46273     | Phosphoglycerate kinase                                               |
| 1.7 | P82610     | 5-methyltetrahydropteroyltriglutamate--homocysteine methyltransferase |
| 1.7 | A0A1D8PGS7 | Phosphoribosylglycinamide formyltransferase                           |
| 1.7 | Q9P975     | Eukaryotic translation initiation factor 4E                           |
| 1.7 | A0A1D8PI24 | D-arabinose 1-dehydrogenase                                           |
| 1.7 | A0A1D8PL85 | Aspartate aminotransferase                                            |
| 1.7 | Q9URB4     | Fructose-bisphosphate aldolase                                        |
| 1.7 | A0A1D8PP00 | Arginase                                                              |
| 1.7 | A0A1D8PGN7 | Hypoxanthine phosphoribosyltransferase                                |
| 1.7 | Q59US8     | Uncharacterized protein                                               |
| 1.7 | Q5ABA5     | Uncharacterized protein                                               |
| 1.7 | Q5AK88     | Uncharacterized protein                                               |
| 1.7 | P83784     | Heat shock protein SSC1, mitochondrial                                |
| 1.7 | Q5ABP8     | Protein ROT1                                                          |
| 1.7 | P83776     | Hexokinase-2                                                          |
| 1.7 | A0A1D8PKZ7 | Pyrroline-5-carboxylate reductase                                     |
| 1.7 | A0A1D8PGT5 | Aldehyde dehydrogenase                                                |
| 1.7 | Q5A784     | Ofr1p                                                                 |
| 1.7 | A0A1D8PMB3 | Xylulokinase                                                          |
| 1.7 | Q59PZ6     | 6-phosphogluconolactonase                                             |
| 1.7 | Q5A860     | Translationally-controlled tumor protein homolog                      |
| 1.7 | O13318     | pH-responsive protein 2                                               |
| 1.7 | Q59KZ1     | Aminopeptidase 2                                                      |
| 1.7 | A0A1D8PM15 | Uncharacterized protein                                               |
| 1.6 | P13649     | Orotidine 5'-phosphate decarboxylase                                  |
| 1.6 | Q59R31     | Argininosuccinate lyase                                               |
| 1.6 | A0A1D8PLY4 | Pyruvate carboxylase                                                  |
| 1.6 | A0A1D8PEM3 | Doa1p                                                                 |
| 1.6 | Q5A2A7     | Metalloendopeptidase                                                  |
| 1.6 | Q5AG89     | Thioredoxin reductase                                                 |
| 1.6 | Q5A6L1     | Fumarase                                                              |
| 1.6 | A0A1D8PF30 | Tubulin-binding prefolding complex subunit                            |
| 1.6 | A0A1D8PPI6 | Cip1p                                                                 |
| 1.6 | P31353     | Phosphomannomutase                                                    |

|     |            |                                                                 |
|-----|------------|-----------------------------------------------------------------|
| 1.6 | Q5ADP5     | ADP-ribose diphosphatase                                        |
| 1.6 | Q5AKW4     | Phosphoacetylglucosamine mutase                                 |
| 1.6 | Q9Y7F0     | Peroxiredoxin TSA1-A                                            |
| 1.6 | A0A1D8PS11 | Orotate phosphoribosyltransferase                               |
| 1.6 | Q5A750     | Transketolase                                                   |
| 1.6 | A0A1D8PKJ4 | Saccharopine dehydrogenase                                      |
| 1.6 | Q5ADT4     | Glycerol 2-dehydrogenase                                        |
| 1.6 | A0A1D8PH00 | Asr3p                                                           |
| 1.6 | A0A1D8PQK5 | 3-isopropylmalate dehydrogenase                                 |
| 1.6 | A0A1D8PL14 | Ornithine-oxo-acid transaminase                                 |
| 1.6 | P34948     | Mannose-6-phosphate isomerase                                   |
| 1.6 | A0A1D8PCV7 | L-aminoadipate-semialdehyde dehydrogenase                       |
| 1.6 | A0A1D8PPG7 | Ketol-acid reductoisomerase, mitochondrial                      |
| 1.6 | Q59NQ5     | Glutathione-disulfide reductase                                 |
| 1.6 | Q5A7S3     | Uncharacterized protein                                         |
| 1.6 | Q59WG6     | Aspartyl aminopeptidase                                         |
| 1.6 | A0A1D8PQ26 | Adenosine kinase                                                |
| 1.6 | P83773     | Acetyl-CoA hydrolase                                            |
| 1.6 | P83783     | Adenosylhomocysteinase                                          |
| 1.6 | A0A1D8PNG9 | Threonine synthase                                              |
| 1.6 | A0A1D8PEI2 | Dihydroxyacetone kinase                                         |
| 1.6 | P83779     | Pyruvate decarboxylase                                          |
| 1.6 | A0A1D8PES3 | Ran GTPase-binding protein                                      |
| 1.6 | P83777     | Inorganic pyrophosphatase                                       |
| 1.6 | Q59Z14     | Deoxyhypusine hydroxylase                                       |
| 1.6 | A0A1D8PLJ3 | Superoxide dismutase [Cu-Zn]                                    |
| 1.6 | Q5A435     | Prefoldin subunit 4                                             |
| 1.6 | A0A1D8PCN0 | Bifunctional UDP-glucose 4-epimerase/aldose 1-epimerase         |
| 1.6 | Q5A1Q0     | Glucose-6-phosphate 1-epimerase                                 |
| 1.5 | A0A1D8PSU2 | Pyridoxamine-phosphate oxidase                                  |
| 1.5 | A0A1D8PMF8 | Calmodulin                                                      |
| 1.5 | Q59TZ8     | Phosphotransferase                                              |
| 1.5 | A0A1D8PTR7 | Tropomyosin                                                     |
| 1.5 | Q5A017     | Transaldolase                                                   |
| 1.5 | A0A1D8PGS5 | Isocitrate dehydrogenase [NAD] subunit, mitochondrial           |
| 1.5 | Q59WG0     | Adenosine 5'-monophosphoramidase                                |
| 1.5 | Q5A330     | Pex19p                                                          |
| 1.5 | A0A1D8PNP4 | Uncharacterized protein                                         |
| 1.5 | A0A1D8PRM7 | Phosphoenolpyruvate carboxykinase                               |
| 1.5 | A0A1D8PRR5 | Argininosuccinate synthase                                      |
| 1.5 | Q5AL34     | Psa2p                                                           |
| 1.5 | A0A1D8PHC9 | Aspartate transaminase                                          |
| 1.5 | A0A1D8PFX8 | Rab GDP dissociation inhibitor                                  |
| 1.5 | P79023     | Phospho-2-dehydro-3-deoxyheptonate aldolase, tyrosine-inhibited |

|     |            |                                                                             |
|-----|------------|-----------------------------------------------------------------------------|
| 1.5 | A0A1D8PE67 | Bifunctional aminoimidazole ribotide synthase/glycinamide ribotide synthase |
| 1.5 | A0A1D8PP43 | Adh1p                                                                       |
| 1.5 | Q59QN6     | Formate dehydrogenase                                                       |
| 1.5 | A0A1D8PHS4 | Uncharacterized protein                                                     |
| 1.5 | A0A1D8PSH3 | Citrate synthase                                                            |

(B) Proteins decreased in abundance in *C. albicans* incubated in *G. mellonella* hemolymph.

| Fold Change (-) | Uniprot ID | Protein Name                                                                                                                             |
|-----------------|------------|------------------------------------------------------------------------------------------------------------------------------------------|
| 374.0           | A0A1D8PF90 | Uncharacterized protein                                                                                                                  |
| 259.6           | Q5AB84     | Uncharacterized protein                                                                                                                  |
| 235.3           | Q5AB87     | Ribosomal 60S subunit protein L16A                                                                                                       |
| 201.5           | A0A1D8PPS1 | Ribosomal 60S subunit protein L25                                                                                                        |
| 187.2           | Q5A0Z9     | Pyruvate dehydrogenase E1 component subunit alpha (EC 1.2.4.1)                                                                           |
| 184.3           | Q5AMT7     | Bfr1p                                                                                                                                    |
| 177.0           | A0A1D8PDZ1 | Ribosomal 60S subunit protein L34B                                                                                                       |
| 155.7           | Q5A0V9     | rRNA methyltransferase                                                                                                                   |
| 151.9           | A0A1D8PF79 | Glutamate decarboxylase (EC 4.1.1.15)                                                                                                    |
| 147.9           | A0A1D8PN83 | Ribosomal 40S subunit protein S11A                                                                                                       |
| 133.9           | A0A1D8PDT4 | Ribosomal 60S subunit protein L39                                                                                                        |
| 126.4           | A0A1D8PCQ5 | Ribosomal 60S subunit protein L26B                                                                                                       |
| 115.5           | A0A1D8PRR7 | Acetyl-CoA carboxylase                                                                                                                   |
| 109.8           | Q59TE0     | Ribosomal 60S subunit protein L17B                                                                                                       |
| 106.9           | Q59LS1     | Ribosomal 60S subunit protein L3                                                                                                         |
| 105.3           | Q5AML3     | Oxidoreductase                                                                                                                           |
| 103.3           | O59931     | 60S ribosomal protein L13                                                                                                                |
| 98.4            | A0A1D8PHH4 | Ribosomal 60S subunit protein L33A                                                                                                       |
| 81.6            | Q5AK53     | ATP-dependent 6-phosphofructokinase (ATP-PFK) (Phosphofructokinase) (EC 2.7.1.11) (Phosphohexokinase)                                    |
| 80.7            | Q5AGX8     | Acetyltransferase component of pyruvate dehydrogenase complex (EC 2.3.1.12)                                                              |
| 75.6            | A0A1D8PLC9 | 60S ribosomal protein L20                                                                                                                |
| 71.5            | A0A1D8PMV9 | Threonine--tRNA ligase                                                                                                                   |
| 70.1            | A0A1D8PNQ6 | Ribosomal 40S subunit protein S25B                                                                                                       |
| 68.3            | O43101     | Centromere/microtubule-binding protein CBF5 (Centromere-binding factor 5) (H/ACA snoRNP protein CBF5) (Small nucleolar RNP protein CBF5) |
| 68.2            | A0A1D8PMH8 | Glutamate dehydrogenase                                                                                                                  |
| 67.6            | A0A1D8PR93 | Histone                                                                                                                                  |
| 67.5            | A0A1D8PF56 | H/ACA ribonucleoprotein complex subunit                                                                                                  |



|      |            |                                                                                                                                                                 |
|------|------------|-----------------------------------------------------------------------------------------------------------------------------------------------------------------|
| 65.6 | Q59S06     | Nucleolar protein 58                                                                                                                                            |
| 63.2 | Q5A6R1     | Ribosomal protein L15                                                                                                                                           |
| 62.7 | Q5AKV6     | Pdx1p                                                                                                                                                           |
| 62.6 | A0A1D8PF08 | Ribosomal 60S subunit protein L2A                                                                                                                               |
| 62.4 | A0A1D8PH21 | 60S ribosomal protein L36                                                                                                                                       |
| 58.0 | A0A1D8PI15 | Ribosomal 40S subunit protein S10A                                                                                                                              |
| 57.4 | A0A1D8PPE0 | Ribosomal 40S subunit protein S13                                                                                                                               |
| 56.7 | A0A1D8PCX8 | 60S ribosomal protein L6                                                                                                                                        |
| 56.2 | Q5A782     | Translation initiation factor eIF5B                                                                                                                             |
| 56.1 | Q59PR9     | Transcriptional regulator HMO1 (High mobility group protein 1)                                                                                                  |
| 54.0 | A0A1D8PK43 | Ribosomal 60S subunit protein L18A                                                                                                                              |
| 53.6 | Q5AMQ5     | Carnitine O-acetyltransferase                                                                                                                                   |
| 53.3 | Q59VN2     | Histone H3.1/H3.2                                                                                                                                               |
| 51.3 | Q59VN4     | Histone H4                                                                                                                                                      |
| 48.1 | Q5A5V6     | Pyruvate dehydrogenase E1 component subunit beta (EC 1.2.4.1)                                                                                                   |
| 47.9 | Q5A4E2     | ATP-dependent RNA helicase DED1 (EC 3.6.4.13)                                                                                                                   |
| 47.2 | Q9Y872     | Sulfate adenylyltransferase (EC 2.7.7.4) (ATP-sulfurylase) (Sulfate adenylate transferase) (SAT)                                                                |
| 45.2 | A0A1D8PF11 | Rpl82p                                                                                                                                                          |
| 44.9 | A0A1D8PK40 | Ribosomal protein L19                                                                                                                                           |
| 44.0 | A0A1D8PM75 | Ribosomal 60S subunit protein L30                                                                                                                               |
| 43.6 | Q59QB8     | Gcf1p                                                                                                                                                           |
| 43.3 | Q59T44     | 40S ribosomal protein S8                                                                                                                                        |
| 41.6 | Q5ANA1     | Ribosomal 60S subunit protein L8B                                                                                                                               |
| 40.5 | A0A1D8PCQ3 | Eukaryotic translation initiation factor 2A (eIF-2A)                                                                                                            |
| 40.4 | Q5A940     | Multiprotein-bridging factor 1                                                                                                                                  |
| 40.2 | A0A1D8PFL9 | Ribosomal 60S subunit protein L14B                                                                                                                              |
| 40.2 | Q5AI86     | Eukaryotic translation initiation factor 3 subunit I (eIF3i) (Eukaryotic translation initiation factor 3 39 kDa subunit homolog) (eIF-3 39 kDa subunit homolog) |
| 40.0 | Q5A5P8     | Tif11p                                                                                                                                                          |
| 39.1 | A0A1D8PK11 | RNA-binding protein                                                                                                                                             |
| 39.1 | A0A1D8PCW6 | Ribosomal 40S subunit protein S16A                                                                                                                              |
| 38.9 | Q5AIB8     | Ribosomal 60S subunit protein L10                                                                                                                               |
| 38.6 | A0A1D8PTZ1 | Uncharacterized protein                                                                                                                                         |
| 38.2 | A0A1D8PGY0 | Ribosomal 60S subunit protein L21A                                                                                                                              |
| 37.8 | Q59KI0     | UTP--glucose-1-phosphate uridylyltransferase (EC 2.7.7.9) (UDP-glucose pyrophosphorylase) (UDPGP) (UGPase)                                                      |
| 37.0 | Q5ACM9     | Eukaryotic translation initiation factor 3 subunit J (eIF3j) (Eukaryotic translation initiation factor 3 30 kDa subunit) (eIF-3 30 kDa)                         |
| 36.4 | A0A1D8PP59 | Ubiquinol--cytochrome-c reductase subunit                                                                                                                       |
| 36.1 | Q5ALV6     | 40S ribosomal protein S26                                                                                                                                       |
| 35.7 | A0A1D8PHG1 | Oxysterol-binding protein                                                                                                                                       |
| 35.2 | A0A1D8PFG4 | 60S ribosomal protein L27                                                                                                                                       |

|      |            |                                                                                                                                                                                                                                                                                                                                                                             |
|------|------------|-----------------------------------------------------------------------------------------------------------------------------------------------------------------------------------------------------------------------------------------------------------------------------------------------------------------------------------------------------------------------------|
| 35.2 | Q59LU0     | ATP-dependent RNA helicase DBP2 (EC 3.6.4.13)                                                                                                                                                                                                                                                                                                                               |
| 35.1 | Q5AGZ8     | ATP-dependent 6-phosphofructokinase (ATP-PFK) (Phosphofructokinase) (EC 2.7.1.11) (Phosphohexokinase)                                                                                                                                                                                                                                                                       |
| 34.9 | Q9UVJ4     | 60S ribosomal protein L10a                                                                                                                                                                                                                                                                                                                                                  |
| 34.9 | A0A1D8PPN6 | Ribosomal 60S subunit protein L32                                                                                                                                                                                                                                                                                                                                           |
| 33.9 | Q5AGV4     | Eukaryotic translation initiation factor 3 subunit B (eIF3b) (Eukaryotic translation initiation factor 3 90 kDa subunit homolog) (eIF3 p90) (Translation initiation factor eIF3 p90 subunit homolog)                                                                                                                                                                        |
| 33.5 | Q5AJD9     | Acyl-coenzyme A oxidase                                                                                                                                                                                                                                                                                                                                                     |
| 32.5 | A0A1D8PP14 | Ribosomal 60S subunit protein L43A                                                                                                                                                                                                                                                                                                                                          |
| 32.2 | Q5AI20     | Fe-S cluster-binding ribosome biosynthesis protein                                                                                                                                                                                                                                                                                                                          |
| 32.0 | A0A1D8PTR4 | Ribosomal 40S subunit protein S29A                                                                                                                                                                                                                                                                                                                                          |
| 31.7 | A0A1D8PU46 | snoRNP complex protein                                                                                                                                                                                                                                                                                                                                                      |
| 30.9 | Q59TB4     | Uncharacterized protein                                                                                                                                                                                                                                                                                                                                                     |
| 30.8 | Q96W54     | 40S ribosomal protein S22-A                                                                                                                                                                                                                                                                                                                                                 |
| 30.5 | Q5A900     | Ribosomal 40S subunit protein S2                                                                                                                                                                                                                                                                                                                                            |
| 29.7 | Q59ZE0     | F1F0 ATP synthase subunit 4                                                                                                                                                                                                                                                                                                                                                 |
| 29.5 | A0A1D8PSZ0 | Ife2p                                                                                                                                                                                                                                                                                                                                                                       |
| 29.4 | Q59XW4     | Acetyl-coenzyme A synthetase (EC 6.2.1.1)                                                                                                                                                                                                                                                                                                                                   |
| 29.3 | A0A1D8PJ13 | Bifunctional hydroxyacyl-CoA dehydrogenase/enoyl-CoA hydratase                                                                                                                                                                                                                                                                                                              |
| 29.3 | Q5AME2     | Pentafunctional AROM polypeptide [Includes: 3-dehydroquininate synthase (DHQS) (EC 4.2.3.4); 3-phosphoshikimate 1-carboxyvinyltransferase (EC 2.5.1.19) (5-enolpyruvylshikimate-3-phosphate synthase) (EPSP synthase) (EPSPS); Shikimate kinase (SK) (EC 2.7.1.71); 3-dehydroquininate dehydratase (3-dehydroquinase) (EC 4.2.1.10); Shikimate dehydrogenase (EC 1.1.1.25)] |
| 28.5 | A0A1D8PFV4 | mRNA-binding protein                                                                                                                                                                                                                                                                                                                                                        |
| 28.3 | A0A1D8PHW1 | Ribosomal 60S subunit protein L11B                                                                                                                                                                                                                                                                                                                                          |
| 27.8 | Q59VR3     | FK506-binding protein 3 (EC 5.2.1.8) (Peptidyl-prolyl cis-trans isomerase) (PPIase) (Rotamase)                                                                                                                                                                                                                                                                              |
| 27.5 | Q59ZV5     | Eukaryotic translation initiation factor 3 subunit G (eIF3g) (Eukaryotic translation initiation factor 3 RNA-binding subunit) (eIF-3 RNA-binding subunit) (Translation initiation factor eIF3 p33 subunit homolog) (eIF3 p33 homolog)                                                                                                                                       |
| 26.4 | Q59PV8     | ATP synthase subunit d, mitochondrial                                                                                                                                                                                                                                                                                                                                       |
| 26.4 | Q5AML1     | Eukaryotic translation initiation factor 3 subunit C (eIF3c) (Eukaryotic translation initiation factor 3 93 kDa subunit homolog) (eIF3 p93) (Translation initiation factor eIF3, p93 subunit homolog)                                                                                                                                                                       |
| 26.1 | A0A1D8PRG0 | Mitochondrial 54S ribosomal protein YmL2                                                                                                                                                                                                                                                                                                                                    |
| 25.6 | Q5A389     | Ribosomal 40S subunit protein S20                                                                                                                                                                                                                                                                                                                                           |
| 24.6 | A0A1D8PSK2 | 40S ribosomal protein S30                                                                                                                                                                                                                                                                                                                                                   |
| 24.4 | A0A1D8PSV5 | Ribosomal 40S subunit protein S3                                                                                                                                                                                                                                                                                                                                            |
| 24.4 | A0A1D8PDL6 | Ribosomal 60S subunit protein L7A                                                                                                                                                                                                                                                                                                                                           |
| 23.3 | A0A1D8PGY8 | Ribosomal 40S subunit protein S9B                                                                                                                                                                                                                                                                                                                                           |

|      |            |                                                                                                                                                                                                          |
|------|------------|----------------------------------------------------------------------------------------------------------------------------------------------------------------------------------------------------------|
| 22.7 | Q5A7K0     | 40S ribosomal protein S24                                                                                                                                                                                |
| 22.5 | A0A1D8PIF0 | Uncharacterized protein                                                                                                                                                                                  |
| 22.4 | Q5A5Q8     | 40S ribosomal protein S4                                                                                                                                                                                 |
| 22.2 | A0A1D8PD83 | Septin                                                                                                                                                                                                   |
| 22.0 | A0A1D8PD02 | Uncharacterized protein                                                                                                                                                                                  |
| 21.2 | A0A1D8PEV4 | Ribosomal 60S subunit protein L42A                                                                                                                                                                       |
| 21.0 | A0A1D8PSQ3 | Type I HSP40 co-chaperone                                                                                                                                                                                |
| 20.8 | A0A1D8PK30 | Ribosomal 60S subunit protein L35A                                                                                                                                                                       |
| 20.6 | Q5AI37     | Probable metalloprotease ARX1 (EC 3.-.-.) (Associated with ribosomal export complex protein 1)                                                                                                           |
| 20.6 | Q5AJF7     | Ribosomal 60S subunit protein L12A                                                                                                                                                                       |
| 20.6 | A0A1D8PTH3 | Alpha-ketoglutarate dehydrogenase                                                                                                                                                                        |
| 20.5 | A0A1D8PIP0 | Slr1p                                                                                                                                                                                                    |
| 20.1 | Q5A7P7     | F1F0 ATP synthase subunit 5                                                                                                                                                                              |
| 20.0 | A0A1D8PEX3 | DNA-directed RNA polymerase subunit (EC 2.7.7.6)                                                                                                                                                         |
| 20.0 | Q59YH4     | Chaperonin-containing T-complex subunit                                                                                                                                                                  |
| 19.8 | A0A1D8PL99 | 40S ribosomal protein S6                                                                                                                                                                                 |
| 19.7 | Q5A8Y5     | DNA-directed RNA polymerase subunit beta (EC 2.7.7.6)                                                                                                                                                    |
| 19.5 | Q59LF9     | Methionine aminopeptidase 2 (MAP 2) (MetAP 2) (EC 3.4.11.18) (Peptidase M)                                                                                                                               |
| 19.4 | A0A1D8PF45 | Ribosomal protein L37                                                                                                                                                                                    |
| 19.3 | A0A1D8PE45 | Nicotinate-nucleotide pyrophosphorylase [carboxylating] (EC 2.4.2.19) (Quinolate phosphoribosyltransferase [decarboxylating])                                                                            |
| 19.0 | A0A1D8PK22 | Ribosomal 40S subunit protein S15                                                                                                                                                                        |
| 18.7 | A0A1D8PKZ3 | ATP-dependent RNA helicase                                                                                                                                                                               |
| 18.6 | Q5ALV9     | Cytochrome c oxidase subunit 6A, mitochondrial (Cytochrome c oxidase polypeptide VIa)                                                                                                                    |
| 18.6 | A0A1D8PQS0 | 60S acidic ribosomal protein P0                                                                                                                                                                          |
| 18.6 | Q59P08     | Glyoxylate reductase                                                                                                                                                                                     |
| 18.5 | Q59LZ9     | Tom22p                                                                                                                                                                                                   |
| 18.5 | A0A1D8PJF9 | Acetolactate synthase (EC 2.2.1.6)                                                                                                                                                                       |
| 18.3 | A0A1D8PHA3 | Ubiquinol--cytochrome-c reductase catalytic subunit                                                                                                                                                      |
| 18.3 | Q59N40     | Aspartate aminotransferase (EC 2.6.1.1)                                                                                                                                                                  |
| 18.0 | Q5AJD0     | ATP-dependent RNA helicase DBP5 (EC 3.6.4.13)                                                                                                                                                            |
| 17.7 | Q5AAU3     | Protein transport protein SEC31                                                                                                                                                                          |
| 17.6 | Q59U72     | Ferrochelatase (EC 4.99.1.1)                                                                                                                                                                             |
| 17.4 | A0A1D8PQQ5 | Ribosomal 40S subunit protein S18B                                                                                                                                                                       |
| 17.4 | Q9HFQ7     | 60S acidic ribosomal protein P1-A (CaRP1A)                                                                                                                                                               |
| 17.3 | Q59YC4     | Chaperonin-containing T-complex subunit                                                                                                                                                                  |
| 17.3 | Q59PL9     | Eukaryotic translation initiation factor 3 subunit A (eIF3a) (Eukaryotic translation initiation factor 3 110 kDa subunit homolog) (eIF3 p110) (Translation initiation factor eIF3, p110 subunit homolog) |
| 17.2 | A0A1D8PP21 | Methionine--tRNA ligase                                                                                                                                                                                  |
| 17.0 | Q5A3P4     | Tryptophan--tRNA ligase                                                                                                                                                                                  |

|      |            |                                                                                                                                                                  |
|------|------------|------------------------------------------------------------------------------------------------------------------------------------------------------------------|
| 16.6 | Q5A8X7     | Protein FYV4, mitochondrial                                                                                                                                      |
| 16.2 | A0A1D8PHD8 | DNA-directed RNA polymerase core subunit                                                                                                                         |
| 16.1 | A0A1D8PQM4 | DNA-directed RNA polymerase subunit beta (EC 2.7.7.6)                                                                                                            |
| 15.7 | Q59MA9     | Clustered mitochondria protein homolog (Protein TIF31 homolog)                                                                                                   |
| 15.6 | A0A1D8PGM4 | U3 small nucleolar RNA-associated protein 22                                                                                                                     |
| 15.4 | A0A1D8PCC8 | Rrs1p                                                                                                                                                            |
| 15.4 | Q5AK00     | Uncharacterized protein                                                                                                                                          |
| 15.3 | A0A1D8PFV1 | Ribosomal 60S subunit protein L4B                                                                                                                                |
| 15.3 | A0A1D8PDU3 | Ribosomal 40S subunit protein S23B                                                                                                                               |
| 15.3 | Q5AHD3     | Mitochondrial 54S ribosomal protein YmL35                                                                                                                        |
| 15.1 | A0A1D8PSI3 | Uncharacterized protein                                                                                                                                          |
| 15.1 | A0A1D8PQM1 | Single-stranded telomeric DNA-binding/mRNA-binding protein                                                                                                       |
| 14.8 | A0A1D8PCY5 | Septin                                                                                                                                                           |
| 14.4 | A0A1D8PDK6 | 6,7-dimethyl-8-ribityllumazine synthase (DMRL synthase) (EC 2.5.1.78)                                                                                            |
| 14.2 | A0A1D8PEZ0 | Asr1p                                                                                                                                                            |
| 14.2 | A0A1D8PTK1 | Chorismate synthase (EC 4.2.3.5)                                                                                                                                 |
| 14.0 | P39827     | Cell division control protein 10                                                                                                                                 |
| 14.0 | Q5APD2     | Malate synthase (EC 2.3.3.9)                                                                                                                                     |
| 13.9 | Q5A6A1     | Ribosomal 60S subunit protein L24A                                                                                                                               |
| 13.6 | A0A1D8PTM0 | Uncharacterized protein                                                                                                                                          |
| 13.3 | A0A1D8PRK7 | Uncharacterized protein                                                                                                                                          |
| 13.0 | Q5AGZ7     | Ribosomal 60S subunit protein L5                                                                                                                                 |
| 12.9 | A0A1D8PSB9 | Srp40p                                                                                                                                                           |
| 12.9 | A0A1D8PLA3 | rRNA-processing protein                                                                                                                                          |
| 12.9 | P40910     | 40S ribosomal protein S1 (S3aE)                                                                                                                                  |
| 12.8 | A0A1D8PR11 | Uncharacterized protein                                                                                                                                          |
| 12.7 | A0A1D8PU51 | Uncharacterized protein                                                                                                                                          |
| 12.6 | Q5A1D5     | FACT complex subunit SPT16 (CaCDC68) (Cell division control protein 68) (Facilitates chromatin transcription complex subunit SPT16)                              |
| 12.4 | A0A1D8PET7 | Uncharacterized protein                                                                                                                                          |
| 12.3 | A0A1D8PUA6 | DNA-directed RNA polymerase subunit (EC 2.7.7.6)                                                                                                                 |
| 12.2 | Q59YH5     | Mitochondrial 54S ribosomal protein YmL36                                                                                                                        |
| 12.2 | A0A1D8PJF3 | Uncharacterized protein                                                                                                                                          |
| 12.1 | P53704     | Glutamine--fructose-6-phosphate aminotransferase [isomerizing] (GFAT) (EC 2.6.1.16) (D-fructose-6-phosphate amidotransferase) (Hexosephosphate aminotransferase) |
| 12.0 | A0A1D8PCH2 | mRNA-binding protein                                                                                                                                             |
| 11.8 | Q5A6S0     | Mitochondrial 54S ribosomal protein YmL40                                                                                                                        |
| 11.7 | A0A1D8PMD5 | Uncharacterized protein                                                                                                                                          |
| 11.6 | Q59R18     | Asparagine--tRNA ligase                                                                                                                                          |
| 11.5 | Q5AKX2     | Fumarate reductase                                                                                                                                               |
| 11.5 | Q5A1Z1     | Mitochondrial 37S ribosomal protein MRP21                                                                                                                        |
| 11.4 | Q5AEN2     | Ribosomal 60S subunit protein L9B                                                                                                                                |

|      |            |                                                                                                                                 |
|------|------------|---------------------------------------------------------------------------------------------------------------------------------|
| 11.3 | Q59M32     | Mitochondrial 54S ribosomal protein YmL15                                                                                       |
| 11.3 | Q5A678     | Ssz1p                                                                                                                           |
| 11.3 | A0A1D8PKK1 | Translocon subunit                                                                                                              |
| 11.2 | Q5AF38     | Alpha-mannosidase (EC 3.2.1.-)                                                                                                  |
| 11.2 | A0A1D8PDE3 | Coatomer subunit gamma                                                                                                          |
| 11.2 | Q59NG6     | Mitochondrial 37S ribosomal protein PET123                                                                                      |
| 11.2 | Q5A0W7     | RuvB-like helicase 1 (EC 3.6.4.12)                                                                                              |
| 10.9 | A0A1D8PRJ6 | Translation initiation factor eIF2 subunit beta                                                                                 |
| 10.9 | Q5ADQ6     | 40S ribosomal protein S12                                                                                                       |
| 10.8 | Q5AAS9     | Mitochondrial 54S ribosomal protein YmL19                                                                                       |
| 10.8 | Q5AQ76     | Protein transport protein SEC24                                                                                                 |
| 10.7 | Q9B8D8     | Cytochrome c oxidase subunit 2 (EC 1.9.3.1) (Cytochrome c oxidase polypeptide II)                                               |
| 10.6 | A0A1D8PSC5 | Ribosomal 60S subunit protein L28                                                                                               |
| 10.6 | Q5AJ93     | 40S ribosomal protein S7                                                                                                        |
| 10.3 | Q59ZE2     | 2-methoxy-6-polyprenyl-1,4-benzoquinol methylase, mitochondrial (EC 2.1.1.201) (Ubiquinone biosynthesis methyltransferase COQ5) |
| 10.1 | Q5AGZ9     | RuvB-like helicase 2 (EC 3.6.4.12)                                                                                              |
| 9.9  | A0A1D8PQH1 | Uncharacterized protein                                                                                                         |
| 9.8  | Q5AK02     | Mitochondrial 37S ribosomal protein RSM7                                                                                        |
| 9.8  | Q5AF98     | Zuotin                                                                                                                          |
| 9.8  | A0A1D8PPT5 | Ribosomal 60S subunit protein L23B                                                                                              |
| 9.7  | A0A1D8PHF5 | Ribosomal 60S subunit protein L31B                                                                                              |
| 9.7  | A0A1D8PND4 | Mitochondrial 37S ribosomal protein YMR31                                                                                       |
| 9.7  | A0A1D8PMK0 | Ago1p                                                                                                                           |
| 9.6  | Q5A779     | GTP-binding protein                                                                                                             |
| 9.6  | A0A1D8PDT3 | Ribosomal 40S subunit protein S14B                                                                                              |
| 9.6  | Q5A3N5     | Mitochondrial 54S ribosomal protein YmL13                                                                                       |
| 9.4  | Q59YE8     | Translation termination factor GTPase eRF3                                                                                      |
| 9.3  | Q5ADU3     | Eukaryotic translation initiation factor 3 subunit H (eIF3h)                                                                    |
| 9.2  | O74161     | Chitin biosynthesis protein CHS5                                                                                                |
| 9.1  | Q5AK16     | T-complex protein 1 subunit gamma                                                                                               |
| 9.1  | Q5A798     | Mitochondrial 54S ribosomal protein YmL3                                                                                        |
| 9.1  | A0A1D8PJB0 | Coatomer subunit alpha                                                                                                          |
| 9.1  | A0A1D8PNC8 | Proteasome subunit beta (EC 3.4.25.1)                                                                                           |
| 9.1  | Q59UQ4     | Chromatin-binding transcription coactivator                                                                                     |
| 9.0  | A0A1D8PHP8 | Putative ammonium permease                                                                                                      |
| 9.0  | A0A1D8PRF5 | Sla2p                                                                                                                           |
| 9.0  | A0A1D8PJA6 | Uncharacterized protein                                                                                                         |
| 8.9  | A0A1D8PTP9 | Chaperone ATPase                                                                                                                |
| 8.9  | Q5AEF2     | Protein transport protein SEC13                                                                                                 |
| 8.7  | Q5A1E3     | Transcriptional regulator CBF1                                                                                                  |
| 8.6  | A0A1D8PTY4 | Elf1p                                                                                                                           |
| 8.5  | Q5AK42     | rRNA-processing protein EFG1                                                                                                    |

|     |            |                                                                                      |
|-----|------------|--------------------------------------------------------------------------------------|
| 8.5 | Q59ZH8     | Translation termination factor eRF1                                                  |
| 8.4 | Q5A455     | Protein transport protein SEC23                                                      |
| 8.4 | Q5ALL8     | FACT complex subunit POB3 (Facilitates chromatin transcription complex subunit POB3) |
| 8.4 | Q5ANB2     | ATP-dependent RNA helicase DBP10 (EC 3.6.4.13)                                       |
| 8.4 | Q59VP1     | Histone H2B.2                                                                        |
| 8.4 | A0A1D8PMN9 | Chaperonin-containing T-complex subunit                                              |
| 8.3 | Q59ZI7     | Mitochondrial 54S ribosomal protein YmL10/YmL18                                      |
| 8.2 | Q5A6M9     | SnoRNA-binding protein                                                               |
| 8.2 | A0A1D8PR73 | Uncharacterized protein                                                              |
| 8.1 | Q5AP79     | Mir1p                                                                                |
| 8.1 | Q5A2T2     | ATP-binding cassette family ATPase                                                   |
| 8.1 | O94150     | 37S ribosomal protein S9, mitochondrial                                              |
| 8.0 | P83781     | Mitochondrial outer membrane protein porin (Cytoplasmic antigenic protein 4)         |
| 8.0 | Q5A516     | ADP/ATP carrier protein                                                              |
| 7.9 | A0A1D8PN45 | Dynamin-like GTPase                                                                  |
| 7.8 | A0A1D8PG09 | Stf2p                                                                                |
| 7.7 | A0A1D8PPV5 | Coatomer subunit beta'                                                               |
| 7.7 | A0A1D8PH91 | Mitochondrial 37S ribosomal protein MRP51                                            |
| 7.5 | Q5AK79     | CTP synthase (EC 6.3.4.2) (UTP--ammonia ligase)                                      |
| 7.5 | Q5ALN3     | Uncharacterized protein                                                              |
| 7.4 | Q5A4Y4     | Uncharacterized protein                                                              |
| 7.4 | Q59X93     | Mitochondrial 54S ribosomal protein YmL17/YmL30                                      |
| 7.4 | A0A1D8PK61 | Ribosomal 40S subunit protein S19A                                                   |
| 7.3 | Q59P03     | NADH-cytochrome b5 reductase 1 (EC 1.6.2.2) (Microsomal cytochrome b reductase)      |
| 7.3 | A0A1D8PP33 | Uncharacterized protein                                                              |
| 7.3 | A0A1D8PQC8 | Uncharacterized protein                                                              |
| 7.2 | Q59QD6     | Elongation factor 1-alpha 2 (EF-1-alpha 2)                                           |
| 7.1 | Q5ABD0     | Vacuolar-sorting protein SNF7 (Vacuolar protein-sorting-associated protein 32)       |
| 7.1 | Q5A4L1     | Uncharacterized protein                                                              |
| 7.0 | Q5AJU7     | AP-1-like transcription factor CAP1                                                  |
| 7.0 | A0A1D8PSW1 | Pex14p                                                                               |
| 7.0 | Q5A7M1     | ADP-ribosylation factor GTPase-activating protein                                    |
| 7.0 | A0A1D8PGA2 | Protein phosphatase regulator                                                        |
| 6.9 | Q59MZ8     | DNA-directed RNA polymerase core subunit                                             |
| 6.9 | Q5ACU9     | Transcription factor                                                                 |
| 6.8 | Q5A0M4     | Elongation factor 2 (EF-2)                                                           |
| 6.7 | A0A1D8PK85 | Proteasome core particle subunit beta 1                                              |
| 6.7 | Q5A4L3     | Uncharacterized protein                                                              |
| 6.7 | Q5A7K7     | Uncharacterized protein                                                              |
| 6.7 | Q59LZ5     | Protein channel                                                                      |
| 6.7 | A0A1D8PJ76 | Uncharacterized protein                                                              |

|     |            |                                                                                             |
|-----|------------|---------------------------------------------------------------------------------------------|
| 6.6 | Q59YF4     | Increased recombination centers protein 22-1                                                |
| 6.6 | Q59QN7     | Succinate dehydrogenase [ubiquinone] iron-sulfur subunit, mitochondrial (EC 1.3.5.1)        |
| 6.6 | A0A1D8PJ20 | Proteasome endopeptidase complex (EC 3.4.25.1)                                              |
| 6.6 | A0A1D8PEY9 | Ribosomal 40S subunit protein S17B                                                          |
| 6.5 | A0A1D8PH72 | Uncharacterized protein                                                                     |
| 6.5 | A0A1D8PFZ9 | U3 small nucleolar ribonucleoprotein protein MPP10                                          |
| 6.4 | Q5AA47     | Arp2/3 complex 34 kDa subunit                                                               |
| 6.4 | A0A1D8PGR5 | Uncharacterized protein                                                                     |
| 6.4 | A0A1D8PRM5 | F1F0 ATP synthase subunit f                                                                 |
| 6.4 | A0A1D8PL86 | Mlp1p                                                                                       |
| 6.3 | Q5A6R2     | Bifunctional phosphoribosylaminoimidazolecarboxamide formyltransferase/IMP cyclohydrolase   |
| 6.3 | Q59Y36     | Uncharacterized protein                                                                     |
| 6.3 | P12461     | Thymidylate synthase (TS) (TSase) (EC 2.1.1.45)                                             |
| 6.3 | Q5AEI1     | Nuo2p                                                                                       |
| 6.2 | Q5AI14     | Trehalose-phosphatase                                                                       |
| 6.2 | Q59RP7     | 54S ribosomal protein L4, mitochondrial                                                     |
| 6.2 | Q5AFG1     | Ribosome biogenesis protein ALB1                                                            |
| 6.1 | Q5AHA6     | AMP deaminase                                                                               |
| 6.1 | A0A1D8PQJ8 | Uncharacterized protein                                                                     |
| 6.1 | A0A1D8PRA6 | Uncharacterized protein                                                                     |
| 6.1 | Q5ABS1     | Cytochrome b-c1 complex subunit 7                                                           |
| 6.0 | Q59Z11     | Actin-related protein 3                                                                     |
| 6.0 | A0A1D8PQN0 | Ribosomal 40S subunit protein S28B                                                          |
| 6.0 | Q5ABZ2     | Transcription factor RBF1 (RPG-box-binding factor 1)                                        |
| 5.9 | Q59Z65     | Proteasome core particle subunit beta 5                                                     |
| 5.9 | Q9UVL1     | Non-histone chromosomal protein 6                                                           |
| 5.9 | Q5A5V8     | Uncharacterized protein                                                                     |
| 5.8 | Q5ALV5     | Cytochrome c oxidase subunit IV                                                             |
| 5.8 | A0A1D8PFH2 | Ribosome biosynthesis protein                                                               |
| 5.7 | Q5ANL6     | 13 kDa ribonucleoprotein-associated protein                                                 |
| 5.7 | A0A1D8PLR7 | NADPH--cytochrome P450 reductase (CPR) (p450R) (EC 1.6.2.4)                                 |
| 5.6 | A0A1D8PTY6 | Proteasome endopeptidase complex (EC 3.4.25.1)                                              |
| 5.6 | A0A1D8PDE2 | Aldo-keto reductase superfamily protein                                                     |
| 5.5 | Q5ALL3     | tRNA-dihydrouridine(47) synthase [NAD(P)(+)] (EC 1.3.1.89) (tRNA-dihydrouridine synthase 3) |
| 5.5 | Q5AAW3     | ATP-dependent RNA helicase DHH1 (EC 3.6.4.13)                                               |
| 5.4 | A0A1D8PTD1 | Bifunctional carbamoylphosphate synthetase/aspartate transcarbamylase                       |
| 5.4 | A0A1D8PNY3 | Uncharacterized protein                                                                     |
| 5.4 | P53698     | Cytochrome c                                                                                |
| 5.4 | A0A1D8PLW8 | Proteasome regulatory particle lid subunit                                                  |
| 5.4 | A0A1D8PMJ1 | RNA-binding GTPase                                                                          |
| 5.3 | A0A1D8PCU5 | Uncharacterized protein                                                                     |

|     |            |                                                                                                                               |
|-----|------------|-------------------------------------------------------------------------------------------------------------------------------|
| 5.3 | A0A1D8PDC7 | Uncharacterized protein                                                                                                       |
| 5.2 | A0A1D8PFP3 | 5'-3' exoribonuclease 1 (EC 3.1.13.-)                                                                                         |
| 5.1 | Q874I4     | Dihydroorotate dehydrogenase (quinone), mitochondrial (DHOD) (DHODase) (DHODEHASE) (EC 1.3.5.2) (Dihydroorotate oxidase)      |
| 5.1 | A0A1D8PMP9 | Methionine aminopeptidase (EC 3.4.11.18)                                                                                      |
| 5.1 | Q59YJ9     | mRNA-binding translational activator                                                                                          |
| 5.0 | A0A1D8PRA1 | Mitochondrial 54S ribosomal protein YmL49                                                                                     |
| 5.0 | Q5AK59     | ATP-dependent RNA helicase HAS1 (EC 3.6.4.13)                                                                                 |
| 5.0 | A0A1D8PNN8 | Cam1-1p                                                                                                                       |
| 4.9 | Q59QC1     | Mitochondrial 54S ribosomal protein YmL28                                                                                     |
| 4.9 | Q8NJJ3     | Acetyl-coenzyme A synthetase 2 (EC 6.2.1.1) (Acetate--CoA ligase 2) (Acyl-activating enzyme 2)                                |
| 4.9 | A0A1D8PU67 | Proteasome core particle subunit beta 2                                                                                       |
| 4.9 | Q59K70     | Uncharacterized protein                                                                                                       |
| 4.8 | A0A1D8PQ03 | Uncharacterized protein                                                                                                       |
| 4.8 | Q3MNT0     | Transcription elongation factor SPT6 (Chromatin elongation factor SPT6)                                                       |
| 4.8 | Q59RQ6     | Dihydrolipoyl dehydrogenase (EC 1.8.1.4)                                                                                      |
| 4.8 | Q5A501     | ESCRT-III subunit protein                                                                                                     |
| 4.7 | Q59SM8     | Trifunctional formate-tetrahydrofolate ligase/methenyltetrahydrofolate cyclohydrolase/methylenetetrahydrofolate dehydrogenase |
| 4.7 | Q5A8Y6     | Mitochondrial 54S ribosomal protein YmL23                                                                                     |
| 4.7 | A0A1D8PJA9 | Uncharacterized protein                                                                                                       |
| 4.7 | A0A1D8PM44 | Methylenetetrahydrofolate dehydrogenase (NAD(+))                                                                              |
| 4.7 | A0A1D8PPJ1 | Cic1p                                                                                                                         |
| 4.6 | A0A1D8PQJ1 | Uncharacterized protein                                                                                                       |
| 4.6 | A0A1D8PEV9 | Mitochondrial 37S ribosomal protein MRPS5                                                                                     |
| 4.6 | A0A1D8PIF1 | Uncharacterized protein                                                                                                       |
| 4.6 | A0A1D8PHT4 | Uncharacterized protein                                                                                                       |
| 4.6 | Q59N42     | Serine/threonine-protein phosphatase (EC 3.1.3.16)                                                                            |
| 4.6 | A0A1D8PLQ3 | Gly-Xaa carboxypeptidase                                                                                                      |
| 4.6 | A0A1D8PG96 | Hsp70 family ATPase                                                                                                           |
| 4.6 | Q5A8Z9     | Uncharacterized protein                                                                                                       |
| 4.5 | A0A1D8PND9 | Coatomer subunit delta                                                                                                        |
| 4.5 | Q59XP0     | Protein transport protein SEC9                                                                                                |
| 4.5 | Q92206     | Squalene monooxygenase (EC 1.14.14.17) (Squalene epoxidase) (SE)                                                              |
| 4.5 | Q5A6P2     | RNA cytidine acetyltransferase (EC 2.3.1.-) (18S rRNA cytosine acetyltransferase)                                             |
| 4.4 | A0A1D8PKD3 | Nucleolar GTP-binding protein 1                                                                                               |
| 4.4 | A0A1D8PPQ1 | Tif3p                                                                                                                         |
| 4.4 | A0A1D8PHY2 | Mitochondrial 54S ribosomal protein YmL7/YmL5                                                                                 |
| 4.4 | Q5AG43     | Ribosomal 40S subunit protein S5                                                                                              |
| 4.4 | Q92410     | Alpha,alpha-trehalose-phosphate synthase [UDP-forming] (EC                                                                    |



|     |            |                                                                                                                                                                 |
|-----|------------|-----------------------------------------------------------------------------------------------------------------------------------------------------------------|
|     |            | 2.4.1.15) (Trehalose-6-phosphate synthase) (UDP-glucose-glucosephosphate glucosyltransferase)                                                                   |
| 4.3 | A0A1D8PRL4 | Mis12p                                                                                                                                                          |
| 4.3 | Q5APB9     | Uncharacterized protein                                                                                                                                         |
| 4.3 | Q59Y40     | SnoRNA-binding rRNA-processing protein                                                                                                                          |
| 4.3 | Q5A222     | NADH-ubiquinone oxidoreductase                                                                                                                                  |
| 4.3 | Q5A397     | Hsp70 family ATPase                                                                                                                                             |
| 4.3 | Q5A302     | Endoplasmic reticulum vesicle protein 25                                                                                                                        |
| 4.3 | Q5A3P1     | Exosome catalytic subunit                                                                                                                                       |
| 4.2 | A0A1D8PRU4 | Actin-related protein 2/3 complex subunit 4                                                                                                                     |
| 4.2 | A0A1D8PI73 | Translation initiation factor eIF4G                                                                                                                             |
| 4.2 | Q5A4X9     | Ribonuclease                                                                                                                                                    |
| 4.2 | A0A1D8PHI0 | Replication factor C subunit 1                                                                                                                                  |
| 4.2 | A0A1D8PF50 | 18S rRNA pseudouridine methyltransferase                                                                                                                        |
| 4.1 | A0A1D8PE97 | Glycine cleavage system P protein (EC 1.4.4.2)                                                                                                                  |
| 4.1 | A0A1D8PSN8 | rRNA (Cytosine-C5-)-methyltransferase                                                                                                                           |
| 4.1 | A0A1D8PJ73 | Ali1p                                                                                                                                                           |
| 4.1 | Q5AJA5     | DEAH-box ATP-dependent RNA helicase                                                                                                                             |
| 4.1 | A0A1D8PFJ8 | DNA-directed RNA polymerase core subunit                                                                                                                        |
| 4.1 | A0A1D8PK71 | Uncharacterized protein                                                                                                                                         |
| 4.1 | Q59LF3     | Regulator of cytoskeleton and endocytosis RVS167                                                                                                                |
| 4.0 | Q59KZ3     | Uridylate kinase (UK) (EC 2.7.4.14) (ATP:UMP phosphotransferase) (Deoxycytidylate kinase) (CK) (dCMP kinase) (Uridine monophosphate kinase) (UMP kinase) (UMPK) |
| 4.0 | Q59PZ1     | Proteasome endopeptidase complex (EC 3.4.25.1)                                                                                                                  |
| 4.0 | Q5AI30     | Mitochondrial 37S ribosomal protein RSM24                                                                                                                       |
| 4.0 | Q5AH14     | Tom40p                                                                                                                                                          |
| 4.0 | P10613     | Lanosterol 14-alpha demethylase (EC 1.14.13.70) (CYPLI) (Cytochrome P450 51) (Cytochrome P450-14DM) (Cytochrome P450-LIA1) (Sterol 14-alpha demethylase)        |
| 4.0 | A0A1D8PT60 | Arc40p                                                                                                                                                          |
| 3.9 | A0A1D8PCP4 | Uncharacterized protein                                                                                                                                         |
| 3.9 | A0A1D8PU27 | Uncharacterized protein                                                                                                                                         |
| 3.9 | A0A1D8PQQ7 | mRNA-binding protein                                                                                                                                            |
| 3.9 | A0A1D8PG16 | Ribosomal 60S subunit protein L38                                                                                                                               |
| 3.9 | Q5ADP3     | Transcription regulator                                                                                                                                         |
| 3.9 | Q5A1E8     | Succinate dehydrogenase [ubiquinone] flavoprotein subunit, mitochondrial (EC 1.3.5.1)                                                                           |
| 3.9 | Q5AEE1     | Histone H2A.Z                                                                                                                                                   |
| 3.9 | A0A1D8PIS4 | Trehalose 6-phosphate synthase/phosphatase complex subunit                                                                                                      |
| 3.9 | Q5AK62     | Virulence protein SSD1                                                                                                                                          |
| 3.8 | A0A1D8PMA9 | Uncharacterized protein                                                                                                                                         |
| 3.8 | Q5ADR2     | Glutamate-5-semialdehyde dehydrogenase                                                                                                                          |
| 3.8 | Q5ALK3     | Ribose phosphate diphosphokinase subunit                                                                                                                        |
| 3.8 | Q59QB7     | Chaperonin-containing T-complex alpha subunit                                                                                                                   |
| 3.8 | Q59KY7     | Mitochondrial 37S ribosomal protein RSM18                                                                                                                       |

|     |            |                                                                                                                                   |
|-----|------------|-----------------------------------------------------------------------------------------------------------------------------------|
| 3.7 | Q5A9A9     | RNA-binding signal recognition particle subunit                                                                                   |
| 3.7 | A0A1D8PUB4 | L-itol 2-dehydrogenase                                                                                                            |
| 3.7 | Q59RN2     | Actin-related protein 2/3 complex subunit 5                                                                                       |
| 3.7 | A0A1D8PRR4 | Trans-hexaprenyltransferase                                                                                                       |
| 3.7 | A0A1D8PEA2 | Dolichyl-phosphate beta-D-mannosyltransferase                                                                                     |
| 3.7 | A0A1D8PGL1 | Uncharacterized protein                                                                                                           |
| 3.7 | A0A1D8PHC4 | Uncharacterized protein                                                                                                           |
| 3.7 | Q5A0N3     | Ribonucleoside-diphosphate reductase (EC 1.17.4.1)                                                                                |
| 3.6 | A0A1D8PR80 | Ran guanyl-nucleotide exchange factor                                                                                             |
| 3.6 | Q5APD0     | Uncharacterized protein                                                                                                           |
| 3.5 | A0A1D8PEY6 | Tricalbin                                                                                                                         |
| 3.5 | A0A1D8PQE5 | RNA export factor                                                                                                                 |
| 3.5 | A0A1D8PHE0 | Mitochondrial 37S ribosomal protein MRPS35                                                                                        |
| 3.5 | Q5A8H8     | Pbp2p                                                                                                                             |
| 3.5 | Q5AFE4     | Regulator of cytoskeleton and endocytosis RVS161                                                                                  |
| 3.5 | A0A1D8PMK4 | Uncharacterized protein                                                                                                           |
| 3.5 | Q5AL45     | Elongation factor G, mitochondrial (EF-Gmt) (Elongation factor G 1, mitochondrial) (mEF-G 1) (Elongation factor G1)               |
| 3.5 | A0A1D8PH93 | Uncharacterized protein                                                                                                           |
| 3.5 | A0A1D8PMT6 | Coatomer subunit epsilon                                                                                                          |
| 3.5 | A0A1D8PCC3 | Transcriptional regulator                                                                                                         |
| 3.5 | A0A1D8PNA3 | Peptide alpha-N-acetyltransferase complex A subunit                                                                               |
| 3.5 | A0A1D8PJX3 | Cytochrome b-c1 complex subunit Rieske, mitochondrial (EC 1.10.2.2)                                                               |
| 3.4 | A0A1D8PE03 | Uncharacterized protein                                                                                                           |
| 3.4 | Q59UF7     | Aspartate--tRNA ligase                                                                                                            |
| 3.4 | Q5AH35     | Mitochondrial 54S ribosomal protein MRP49                                                                                         |
| 3.4 | Q59WV9     | Uncharacterized protein                                                                                                           |
| 3.4 | A0A1D8PIR2 | Gcn1p                                                                                                                             |
| 3.3 | A0A1D8PE79 | Oxysterol-binding protein related protein                                                                                         |
| 3.3 | A0A1D8PDD1 | Lipid-binding protein                                                                                                             |
| 3.3 | Q5ABC3     | Elongation factor Tu                                                                                                              |
| 3.3 | A0A1D8PLU5 | Csh3p                                                                                                                             |
| 3.2 | A0A1D8PG50 | F1F0 ATP synthase subunit i                                                                                                       |
| 3.2 | A0A1D8PQQ9 | Mitochondrial 54S ribosomal protein YmL6                                                                                          |
| 3.2 | O94083     | Eukaryotic translation initiation factor 5A (eIF-5A) (eIF-4D)                                                                     |
| 3.2 | Q5A006     | Coatomer subunit zeta                                                                                                             |
| 3.2 | Q5AAR2     | Uncharacterized protein                                                                                                           |
| 3.2 | Q8TGH6     | Guanosine-diphosphatase (GDPase) (EC 3.6.1.42)                                                                                    |
| 3.1 | A0A1D8PMP1 | Glycerol-3-phosphate dehydrogenase (EC 1.1.5.3)                                                                                   |
| 3.1 | Q59T87     | Uncharacterized protein                                                                                                           |
| 3.1 | A0A1D8PFX2 | DNA-directed RNA polymerase core subunit                                                                                          |
| 3.1 | Q5A8X6     | Succinate--CoA ligase [ADP-forming] subunit alpha, mitochondrial (EC 6.2.1.5) (Succinyl-CoA synthetase subunit alpha) (SCS-alpha) |

|     |            |                                                                                                                                                                                        |
|-----|------------|----------------------------------------------------------------------------------------------------------------------------------------------------------------------------------------|
| 3.1 | A0A1D8PC73 | Uncharacterized protein                                                                                                                                                                |
| 3.0 | A0A1D8PL02 | F1F0 ATP synthase subunit e                                                                                                                                                            |
| 3.0 | Q5A6Q4     | tRNA (adenine(58)-N(1))-methyltransferase non-catalytic subunit TRM6 (tRNA(m1A58)-methyltransferase subunit TRM6) (tRNA(m1A58)MTase subunit TRM6)                                      |
| 3.0 | Q59KV8     | Lipid-binding protein                                                                                                                                                                  |
| 3.0 | A0A1D8PLN1 | rRNA-processing protein                                                                                                                                                                |
| 3.0 | A0A1D8PTN4 | snoRNP complex protein                                                                                                                                                                 |
| 3.0 | Q59Z25     | Mitochondrial nucleoid protein                                                                                                                                                         |
| 3.0 | Q5ADP0     | Histone deacetylase (EC 3.5.1.98)                                                                                                                                                      |
| 3.0 | A0A1D8PQ55 | Uncharacterized protein                                                                                                                                                                |
| 3.0 | A0A1D8PG26 | Uncharacterized protein                                                                                                                                                                |
| 3.0 | A0A1D8PRH3 | Ume1p                                                                                                                                                                                  |
| 3.0 | Q5AF71     | Putative phosphotransferase                                                                                                                                                            |
| 2.9 | Q59VX8     | Septation protein 7 (Seventh homolog of septin 1)                                                                                                                                      |
| 2.9 | A0A1D8PM35 | Translation elongation factor 1 subunit beta                                                                                                                                           |
| 2.9 | Q5ADT9     | 37S ribosomal protein S10, mitochondrial (Mitochondrial ribosomal small subunit protein 10)                                                                                            |
| 2.9 | Q59TD5     | NADH dehydrogenase [ubiquinone] flavoprotein 1, mitochondrial (EC 1.6.5.3) (EC 1.6.99.3)                                                                                               |
| 2.9 | A0A1D8PHH2 | Png2p                                                                                                                                                                                  |
| 2.9 | A0A1D8PSC8 | Arc1p                                                                                                                                                                                  |
| 2.8 | Q59RB8     | Isocitrate lyase                                                                                                                                                                       |
| 2.8 | P25997     | Elongation factor 3 (EF-3)                                                                                                                                                             |
| 2.8 | A0A1D8PLK1 | Proteasome core particle subunit beta 6                                                                                                                                                |
| 2.8 | A0A1D8PPW9 | Aminomethyltransferase (EC 2.1.2.10) (Glycine cleavage system T protein)                                                                                                               |
| 2.8 | Q5APK5     | Cytochrome c oxidase subunit Va                                                                                                                                                        |
| 2.8 | A0A1D8PTX1 | Actin-related protein 2                                                                                                                                                                |
| 2.8 | A0A1D8PND7 | Uncharacterized protein                                                                                                                                                                |
| 2.8 | Q59RK3     | Putative serine--tRNA ligase                                                                                                                                                           |
| 2.7 | Q5ANH5     | Ribosomal protein P2B                                                                                                                                                                  |
| 2.7 | A0A1D8PU56 | Long-chain fatty acid-CoA ligase                                                                                                                                                       |
| 2.7 | Q5AJZ5     | Proteasome core particle subunit beta 4                                                                                                                                                |
| 2.7 | A0A1D8PQL8 | Glutamate--tRNA ligase                                                                                                                                                                 |
| 2.7 | Q5A6S7     | Uncharacterized protein                                                                                                                                                                |
| 2.7 | A0A1D8PRH6 | Proteasome endopeptidase complex (EC 3.4.25.1)                                                                                                                                         |
| 2.7 | Q5A5S6     | Malate dehydrogenase (EC 1.1.1.37)                                                                                                                                                     |
| 2.7 | A0A1D8PSE0 | Uncharacterized protein                                                                                                                                                                |
| 2.6 | Q5A7P6     | Mitochondrial 54S ribosomal protein RML2                                                                                                                                               |
| 2.6 | Q5A2A2     | Mitochondrial homologous recombination protein 1                                                                                                                                       |
| 2.6 | Q59XV1     | Calmodulin-dependent protein kinase                                                                                                                                                    |
| 2.6 | Q5AAI8     | Nucleosome assembly protein 1                                                                                                                                                          |
| 2.6 | P83782     | Cytochrome b-c1 complex subunit 2, mitochondrial (Complex III subunit 2) (Core protein II) (Cytoplasmic antigenic protein 5) (Ubiquinol-cytochrome-c reductase complex core protein 2) |

|     |            |                                                                                                                                                                         |
|-----|------------|-------------------------------------------------------------------------------------------------------------------------------------------------------------------------|
| 2.6 | Q59Z24     | DNA-directed RNA polymerase subunit                                                                                                                                     |
| 2.6 | A0A1D8PTI9 | Rgd3p                                                                                                                                                                   |
| 2.6 | Q5ANP6     | Sbp1p                                                                                                                                                                   |
| 2.6 | Q59X67     | Enhanced filamentous growth protein 1                                                                                                                                   |
| 2.6 | A0A1D8PJK2 | D-aminoacyl-tRNA deacylase (EC 3.1.1.-) (EC 3.1.1.96)                                                                                                                   |
| 2.6 | A0A1D8PQD5 | Cytochrome c oxidase subunit                                                                                                                                            |
| 2.5 | A0A1D8PE54 | Bbc1p                                                                                                                                                                   |
| 2.5 | A0A1D8PKC3 | Translation elongation factor EF1B gamma                                                                                                                                |
| 2.5 | O42817     | 40S ribosomal protein S0                                                                                                                                                |
| 2.5 | Q5ADU2     | Lysine--tRNA ligase (EC 6.1.1.6) (Lysyl-tRNA synthetase)                                                                                                                |
| 2.5 | O93827     | Mannose-1-phosphate guanylyltransferase (EC 2.7.7.13) (ATP-mannose-1-phosphate guanylyltransferase) (CASRB1) (GDP-mannose pyrophosphorylase)                            |
| 2.5 | Q5A4Q1     | Adenylate kinase (EC 2.7.4.3) (ATP-AMP transphosphorylase) (ATP:AMP phosphotransferase) (Adenylate kinase cytosolic and mitochondrial) (Adenylate monophosphate kinase) |
| 2.4 | A0A1D8PTS0 | Ribosomal protein P2A                                                                                                                                                   |
| 2.4 | Q59M49     | mRNA-binding ribosome synthesis protein                                                                                                                                 |
| 2.4 | Q5A473     | Gvp36p                                                                                                                                                                  |
| 2.3 | Q59XU9     | Glycerol-3-phosphate dehydrogenase [NAD(+)] (EC 1.1.1.8)                                                                                                                |
| 2.3 | A0A1D8PQ38 | Uncharacterized protein                                                                                                                                                 |
| 2.3 | A0A1D8PD15 | Proteasome regulatory particle lid subunit                                                                                                                              |
| 2.3 | A0A1D8PD99 | mRNA-binding ribosome biosynthesis protein                                                                                                                              |
| 2.3 | Q59QT0     | DNA-directed RNA polymerase core subunit                                                                                                                                |
| 2.2 | Q5AMR4     | Exosome non-catalytic core subunit                                                                                                                                      |
| 2.2 | Q59SI1     | ATPase-activating ribosome biosynthesis protein                                                                                                                         |
| 2.2 | A0A1D8PFS0 | SNAP receptor                                                                                                                                                           |
| 2.1 | Q00310     | Glycolipid 2-alpha-mannosyltransferase 1 (EC 2.4.1.-) (Alpha-1,2-mannosyltransferase 1)                                                                                 |
| 2.1 | A0A1D8PDC4 | ATP synthase subunit alpha                                                                                                                                              |
| 2.1 | A0A1D8PQP7 | Cyb5p                                                                                                                                                                   |
| 2.1 | Q5A850     | Glycogen [starch] synthase (EC 2.4.1.11)                                                                                                                                |
| 2.1 | A0A1D8PGU0 | Hsp70 family chaperone                                                                                                                                                  |
| 2.0 | A0A1D8PTI7 | 40S ribosomal protein S27                                                                                                                                               |
| 2.0 | O93852     | D-arabinono-1,4-lactone oxidase (ALO) (EC 1.1.3.37) (L-galactono-gamma-lactone oxidase)                                                                                 |
| 2.0 | A0A1D8PTG5 | U4/U6-U5 snRNP complex subunit                                                                                                                                          |
| 2.0 | G1UB61     | Septin CDC11 (Cell division control protein 11)                                                                                                                         |
| 2.0 | P0CT51     | Blood-induced peptide 1                                                                                                                                                 |
| 2.0 | A0A1D8PL12 | Uncharacterized protein                                                                                                                                                 |
| 2.0 | Q5A109     | Ubiquitin-ribosomal 40S subunit protein S31 fusion protein                                                                                                              |
| 2.0 | Q59M70     | NADH-cytochrome b5 reductase 2 (EC 1.6.2.2) (Mitochondrial cytochrome b reductase)                                                                                      |
| 2.0 | A0A1D8PRY3 | ATP synthase subunit gamma                                                                                                                                              |
| 2.0 | A0A1D8PCT4 | Phenylalanine--tRNA ligase subunit alpha                                                                                                                                |
| 1.9 | A0A1D8PDI5 | Ubiquitin-binding protein                                                                                                                                               |

|     |            |                                                                                                                              |
|-----|------------|------------------------------------------------------------------------------------------------------------------------------|
| 1.9 | Q5AFA8     | Abp1p                                                                                                                        |
| 1.9 | Q5AHY9     | DNA polymerase epsilon noncatalytic subunit                                                                                  |
| 1.9 | A0A1D8PDE8 | Obg-like ATPase 1                                                                                                            |
| 1.9 | A0A1D8PGX7 | Uncharacterized protein                                                                                                      |
| 1.8 | A0A1D8PC43 | Diphosphomevalonate decarboxylase (EC 4.1.1.33) (Mevalonate pyrophosphate decarboxylase)                                     |
| 1.8 | Q5ACI8     | Peptidyl-prolyl cis-trans isomerase D (PPIase D) (EC 5.2.1.8) (Rotamase D)                                                   |
| 1.8 | Q5AHB1     | Actin cytoskeleton-regulatory complex protein PAN1                                                                           |
| 1.8 | Q59Y38     | Uncharacterized protein                                                                                                      |
| 1.8 | A0A1D8PKZ9 | ATP synthase subunit beta (EC 3.6.3.14)                                                                                      |
| 1.7 | A0A1D8PRP0 | U4/U6-U5 snRNP complex subunit                                                                                               |
| 1.7 | A0A1D8PS79 | Isocitrate dehydrogenase [NADP] (EC 1.1.1.42)                                                                                |
| 1.7 | P0CY34     | Transcriptional repressor TUP1                                                                                               |
| 1.7 | Q5A7P9     | Thioredoxin peroxidase                                                                                                       |
| 1.7 | A0A1D8PR99 | Protein disulfide isomerase                                                                                                  |
| 1.7 | A0A1D8PMH6 | Tryptophan synthase (EC 4.2.1.20)                                                                                            |
| 1.7 | Q5A9D9     | Homoisocitrate dehydrogenase                                                                                                 |
| 1.7 | A0A1D8PJ67 | Uncharacterized protein                                                                                                      |
| 1.7 | A0A1D8PHU0 | Mitochondrial 54S ribosomal protein MRPL50                                                                                   |
| 1.6 | Q5AMQ2     | Clathrin light chain                                                                                                         |
| 1.6 | Q5A893     | F-actin-capping protein subunit alpha                                                                                        |
| 1.6 | Q5A3K7     | Phosphoglycerate dehydrogenase                                                                                               |
| 1.6 | A0A1D8PKE2 | Mitogen-activated protein kinase kinase                                                                                      |
| 1.6 | A0A1D8PPH3 | Uncharacterized protein                                                                                                      |
| 1.6 | A0A1D8PHF8 | Wh11p                                                                                                                        |
| 1.6 | A0A1D8PTZ6 | Uncharacterized protein                                                                                                      |
| 1.6 | Q5ADT0     | Slk19p                                                                                                                       |
| 1.6 | Q59NP1     | Copper transport protein CTR1                                                                                                |
| 1.6 | Q59TU0     | Nascent polypeptide-associated complex subunit beta (NAC-beta) (Beta-NAC)                                                    |
| 1.6 | A0A1D8PKD0 | Uncharacterized protein                                                                                                      |
| 1.5 | A0A1D8PG81 | Hgt7p                                                                                                                        |
| 1.5 | O13426     | Serine hydroxymethyltransferase, cytosolic (SHMT) (EC 2.1.2.1) (Glycine hydroxymethyltransferase) (SHMII) (Serine methylase) |
| 1.5 | P83774     | Guanine nucleotide-binding protein subunit beta-like protein (Cytoplasmic antigenic protein 1)                               |
